1     **High throughput and affordable genome-wide methylation profiling of circulating cell-free DNA by**

2     **Methylated DNA sequencing (MeD-seq) of LpnPI digested fragments**

3

4     Teoman Deger<sup>1\*</sup>, Ruben G Boers<sup>2\*</sup>, Vanja de Weerd<sup>1</sup>, Lindsay Angus<sup>1</sup>, Marjolijn MJ van der Put<sup>1</sup>,

5     Joachim B Boers<sup>2</sup>, Zakia Azmani<sup>3</sup>, Wilfred FJ van IJcken<sup>3</sup>, Dirk J Grünhagen<sup>4</sup>, Lisanne F van Dessel<sup>1</sup>,

6     Martijn PJK Lolkema<sup>1</sup>, Cornelis Verhoef<sup>4</sup>, Stefan Sleijfer<sup>1</sup>, John WM Martens<sup>1</sup>, Joost Gribnau<sup>2‡</sup>, Saskia

7     M Wilting<sup>1‡#</sup>

8

9     \*, ‡ both authors contributed equally

10    # Corresponding author

11

12    <sup>1</sup>Department of Medical Oncology, Erasmus MC Cancer Institute, University Medical Center

13    Rotterdam; <sup>2</sup>Department of Developmental Biology, Erasmus MC, University Medical Center

14    Rotterdam; <sup>3</sup>Center for Biomics, Erasmus MC, University Medical Center Rotterdam, <sup>4</sup>Department of

15    Oncologic Surgery, Erasmus MC, University Medical Center Rotterdam

16

17

18

19

20

21

## 22 **ABSTRACT**

### 23 **Background**

24 DNA methylation detection in liquid biopsies provides a highly promising and much needed means  
 25 for real-time monitoring of disease load in advanced cancer patient care. Compared to the often-  
 26 used somatic mutations, tissue- and cancer-type specific epigenetic marks affect a larger part of the  
 27 cancer genome and generally have a high penetrance throughout the tumour. Here we describe the  
 28 successful application of the recently described MeD-seq assay for genome-wide DNA methylation  
 29 profiling on cell-free DNA (cfDNA). The compatibility of the MeD-seq assay with different types of  
 30 blood collection tubes, cfDNA input amounts, cfDNA isolation methods, and vacuum-concentration  
 31 of samples was evaluated using plasma from both metastatic cancer patients and healthy blood  
 32 donors (HBDs). To investigate the potential value of cfDNA methylation profiling for tumour load  
 33 monitoring, we profiled paired samples from 8 patients with resectable colorectal liver metastases  
 34 (CRLM) before and after surgery.

### 35 **Results**

36 The MeD-seq assay worked on plasma-derived cfDNA from both EDTA and CellSave blood collection  
 37 tubes when at least 10 ng of cfDNA was used. From the 3 evaluated cfDNA isolation methods, both  
 38 the manual QIAamp Circulating Nucleic Acid Kit (Qiagen) and the semi-automated Maxwell® RSC  
 39 ccfDNA Plasma Kit (Promega) were compatible with MeD-seq analysis, whereas the QIASymphony  
 40 DSP Circulating DNA Kit (Qiagen) yielded significantly fewer reads when compared to the QIAamp kit  
 41 ( $P < 0.001$ ). Vacuum-concentration of samples before MeD-seq analysis was possible with samples in  
 42 AVE buffer (QIAamp) or water, but yielded inconsistent results for samples in EDTA-containing  
 43 Maxwell buffer. Principal component analysis showed that pre-surgical samples from CRLM patients  
 44 were very distinct from HBDs, whereas post-surgical samples were more similar. Several described  
 45 methylation markers for colorectal cancer monitoring in liquid biopsies showed differential  
 46 methylation between pre-surgical CRLM samples and HBDs in our data, supporting the validity of our

approach. Results for MSC, ITGA4, GRIA4, and EYA4, were validated by quantitative methylation specific PCR.

## Conclusions

The MeD-seq assay provides a promising new method for cfDNA methylation profiling. Potential future applications of the assay include marker discovery specifically for liquid biopsy analysis as well as direct use as a disease load monitoring tool in advanced cancer patients.

## KEY WORDS:

liquid biopsy, plasma, cfDNA, DNA methylation, MeD-seq, LpnPI, colorectal cancer liver metastases,

## 58 BACKGROUND

59 Liquid biopsies, referring to the sampling of bodily fluids instead of tissue, provide a novel approach  
60 for real-time cancer screening, disease monitoring, and treatment selection in advanced cancer  
61 patients (reviewed in (1)). Currently, treatment of patients with advanced or metastatic solid  
62 tumours is more or less a trial-and-error process, guided where possible by molecular features of the  
63 (primary) tumour. Treatment response in patients is monitored by relatively insensitive and  
64 expensive imaging techniques, such as CT scans and MRI scans, on which (the lack of) treatment  
65 effect usually only becomes visible after 3 months or more. This leads to unnecessary toxicity, loss of  
66 valuable time when treatment is ineffective, and additionally causes anxiety for patients.

67 Liquid biopsies are known to contain trace amounts of cell-free DNA (cfDNA) and cells derived from  
68 the tumour and can be obtained on a regular basis in a minimally invasive manner (2). Interestingly,  
69 in patients with metastatic lung cancer the amount of circulating tumour DNA (ctDNA) in the blood  
70 was found to correlate with the total disease load, indicating that ctDNA can indeed be used to  
71 monitor disease progression (3).

72 However, for reliable estimation of tumour load, we need to ensure that the tumour-specific signal  
73 detected in the liquid biopsy is homogeneously present in virtually all cells of the tumour. This  
74 prohibits the use of polyclonal mutations, which greatly reduces the number of informative  
75 mutations for tumour load estimation in cfDNA (4); (5). Next to the heterogeneity within a tumour,  
76 heterogeneity between tumours further complicates the use of universal hotspot mutation panels  
77 for this purpose. In addition, clonal hematopoiesis, a common aging-associated phenomenon, can  
78 also generate mutations detectable in cfDNA, thereby obscuring the tumour-specific signal (6); (7).

79 Finally, a large part of the tumour genome does not carry mutations and is therefore ignored when  
80 only mutations are investigated in cfDNA. Taking all this into consideration, other tumour-specific  
81 alterations like chromosomal copy number variations (CNVs) and DNA methylation changes may  
82 represent more promising markers for disease load estimation as they affect a much larger part of  
83 the tumour genome. Tumour-specific DNA methylation frequently occurs at CpG islands and is

84 associated with silencing of tumour suppressor genes in cancer (reviewed in (8)). These alterations in  
85 DNA methylation are known to occur early on during cancer development and will therefore have a  
86 high penetrance throughout the tumour. In addition, different cell types have their own lineage-  
87 specific DNA methylation pattern, which is very different in epithelial cells compared to leukocytes,  
88 the predominant contributors to cfDNA (9). As a result, the signal-to-noise ratios for this type of  
89 molecular marker in blood-derived cfDNA will be even further enhanced. Indeed, results from the  
90 Circulating Cell-free Genome Atlas (CCGA; NCT02889978) study indicate that cfDNA methylation  
91 analyses outperform whole-genome sequencing (WGS) and targeted sequencing approaches  
92 interrogating CNVs and mutations for both the detection and classification of many cancer types  
93 (10).

94 The fact that most blood samples only yield small amounts of fragmented cfDNA combined with the  
95 low recovery of DNA after bisulfite conversion (22-66%) (11), renders conventional genome-wide  
96 DNA methylation analyses like whole genome bisulfite sequencing (WGBS) and reduced  
97 representation bisulfite sequencing (RRBS) on cfDNA technically challenging. However, a recent  
98 proof-of-principle study in paediatric solid tumours demonstrates the feasibility of an adapted RRBS  
99 protocol for cfDNA analyses (12); (13). Similarly, Shen et al. developed a method for high throughput  
100 sequencing of immune-precipitated methylated cfDNA (cfMeDIP-seq), which uses antibody-based  
101 enrichment of methylated DNA sequences and is therefore not dependent on bisulfite treatment  
102 (14). However, the use of antibodies invariably introduces noise. In addition, a bias for CpG-poor  
103 regions was observed for MeDIP approaches before, resulting in an overall coverage of about 16% of  
104 all CpG dinucleotides genome-wide (15).

105 Therefore, we applied the recently described MeD-seq method (16), which uses the LpnPI  
106 methylation-dependent restriction enzyme to allow for genome-wide methylation profiling without  
107 the need for harsh bisulfite treatment or the use of potentially biased enrichment techniques, to  
108 cfDNA samples (Figure 1). Contrary to other methylation-dependent enzymes, LpnPI activity is  
109 restricted by a short template size, which prevents over-digestion of CpG-dense regions and

110 subsequent mapping problems. MeD-seq was shown to reliably detect DNA methylation at >50% of  
 111 all CpG dinucleotides genome-wide without a preference for CpG-dense or CpG-poor regions at a  
 112 low sequencing depth (16).

113 Here, we demonstrate the applicability of the MeD-seq method on cfDNA from plasma of healthy  
 114 subjects, and metastatic cancer patients. We explore the compatibility of MeD-seq with various  
 115 blood collection tubes, cfDNA isolation methods and cfDNA storage buffers and show that MeD-seq  
 116 enables disease load monitoring in metastatic cancer patients.

117

# RESULTS

## Successful MeD-seq analysis from 10 ng cfDNA irrespective of blood collection tube

For successful MeD-seq analysis of cfDNA two crucial steps can be identified: **1)** the already fragmented cfDNA (~150bp) needs to be properly digested in a methylation-dependent manner by the LpnPI enzyme into 32bp fragments, and **2)** the low cfDNA input needs to yield sufficient library-prepped DNA for subsequent sequencing. To ensure proper digestion in the first step, all resulting sequencing reads are filtered for the presence of an LpnPI restriction site at the expected position. This is particularly important for cfDNA since, in contrast to genomic DNA with a high molecular weight, undigested cfDNA is of short size and is therefore not necessarily excluded by the DNA fragment size selection step during library preparation.

We first evaluated the potential influence of the type of blood collection tube and cfDNA input amount on the MeD-seq assay performance. Blood from 3 patients (M4, M10, and M19) was collected in EDTA and CellSave tubes during the same blood draw. cfDNA was isolated from the resulting plasma using the manual QIAamp kit and eluted in AVE buffer (RNase-free water with 0.04% NaN<sub>3</sub>). Subsequently, for each sample both 10 ng of cfDNA and the maximal volume of 8 µl of cfDNA (>30 ng cfDNA) were used as input for MeD-seq. The cfDNA input in nanograms was kept equal per patient between EDTA and CellSave-derived cfDNA. The MeD-seq assay was successful regardless of input amount (10 ng vs >30ng). No differences were observed between CellSave and EDTA in the percentage of duplicate reads and the percentage of reads passing the LpnPI filter (Supplementary Figure S1). Principal component analysis of all obtained genome-wide methylation profiles showed that EDTA and CellSave-derived methylation profiles obtained from the same patient were clustered together, irrespective of input amount (Figure 2A and 2B).

In total, 51 QIAamp-isolated cfDNAs (both derived from patients and healthy blood donors) were then subjected to MeD-seq analysis, of which 4 had an input of less than 10 ng cfDNA, 34 had 10 ng cfDNA input, and 13 had more than 10 ng. For all samples with less than 10 ng input the yield after library preparation was insufficient to continue with sequencing, whereas both for samples with 10

ng input and more than 10 ng input only 1 sample failed at this stage (failure rate: 100%, 2.9%, and 7.7%, respectively; Chi-square  $p < 0.001$ ). From the foregoing we can conclude that the current MeD-seq protocol can be used to analyse plasma-derived cfDNA from both EDTA and CellSave blood collection tubes, provided at least 10 ng of cfDNA is available in a maximal volume of 8  $\mu$ l.

To investigate the reproducibility of MeD-seq on cfDNA samples, we have calculated Pearson correlations between the cfDNA methylation profiles obtained from the 4 biological replicates of M4, M10, and M19 (different blood collection tubes and input amount) and compared these to the correlations for these samples with 9 healthy blood donors. As shown in Supplementary figure S2, observed correlations between biological replicates were significantly higher in all 3 patients compared to the correlations with healthy blood donors (Mann-Whitney U test,  $p < 0.005$ ).

A selected panel of genes with leukocyte-specific methylation (17) showed consistent MeD-seq profiles in HBDs (median Pearson correlation = 0.85, range: 0.74 – 0.92, Supplementary figure S3), again demonstrating that MeD-seq yields reproducible results on cfDNA.

# **Not all cfDNA isolation methods are compatible with MeD-seq analysis**

In addition to the 45 QIAamp isolated cfDNA samples with at least 10 ng cfDNA input that were successfully analysed by MeD-seq, we also performed MeD-seq analysis on 37 cfDNA samples isolated by the semi-automated QiaSymphony platform. As shown in Figure 3A and B, cfDNA isolation using the semi-automated QiaSymphony platform ( $n=37$ ) resulted in a significantly lower percentage of reads passing the LpnPI filter and duplicate reads compared to QIAamp isolated samples ( $n=45$ ) (Mann-Whitney U test,  $p < 0.001$ ). In fact, for most QiaSymphony isolated samples the threshold of 10% Lpnpi filtered reads was not met in the first 2M reads after which sequencing was aborted. The significant difference in filtered reads and duplicate reads isolated with QIAamp isolation and the QiaSymphony platform was shown using samples from different individuals. To exclude the possibility that our observations are cohort-specific instead of isolation method related, we isolated cfDNA from different aliquots of the same plasma sample ( $n=2$ ) using different isolation



methods, in which we also included the semi-automated Maxwell platform next to the already mentioned manual QIAamp kit and semi-automated QiaSymphony platform. The percentages of duplicate reads and reads passing the LpnPI filter of paired samples were also lower in the QiaSymphony sample for patient M69 compared to QIAamp and Maxwell (Figure 3C and 3D). For patient M12, the QiaSymphony isolation did not yield sufficient cfDNA for MeD-seq analysis, whereas both QIAamp and Maxwell generated comparable results to those obtained for patient M69. Pearson correlation analysis showed that the cfDNA methylation profiles obtained from paired QIAamp and Maxwell isolated samples correlated well (Pearson's  $r > 0.8$ ), whereas the QiaSymphony isolated cfDNA profile was less well correlated (Pearson's  $r = 0.62$  compared with Maxwell isolation and  $r = 0.64$  compared with QIAamp). Although the effect of QiaSymphony isolation compared to QIAAMP and Maxwell was only shown in 1 paired sample, together with our observations in the 82 unpaired cfDNAs (Figure 3A and 3B), results are indicative of an inhibited enzymatic activity of the LpnPI endonuclease in samples isolated by QiaSymphony. In cfDNA samples this results in sequencing of predominantly undigested cfDNA molecules not removed from the library preparation by size selection. Reads originating from these undigested molecules will be removed from the data by the LpnPI-filter, which only retains reads with a CpG dinucleotide at the central base pair position. Therefore, the low percentage of reads passing this filter in samples isolated on the QiaSymphony platform is characteristic for impaired LpnPI digestion.

As these cfDNA isolation kits contain different elution buffers, we subsequently compared the performance of MeD-seq on 10 ng genomic DNA isolated from MCF7 cells by QIAamp, but eluted in the different elution buffers or water. In general, genomic MCF7 DNA yielded more reads passing the LpnPI-filter as well as a higher percentage of duplicate reads compared to cfDNA samples (Mann-Whitney U test,  $p < 0.001$ , Figure 3E and 3F). This is likely due to the fact that the DNA fragment size selection step in the protocol is unable to eliminate undigested small cfDNA molecules from the sequencing library. Irrespective of the elution buffer used, the obtained percentages of duplicate and filtered reads were sufficient and comparable to water, and the MeD-seq data

obtained from the different MCF-7 samples were highly correlated (Pearson's  $r > 0.90$ ), indicating that differences in elution buffers are not causing the observed LpnPI inhibition in QiaSymphony isolated samples (Figure 3G and 3H).

# **Vacuum concentration of cfDNA samples is compatible with the MeD-seq assay**

In the current protocol the maximal sample input volume is 8  $\mu$ l, requiring a cfDNA concentration of at least 1.25 ng/ $\mu$ l to enable the minimally required input of 10 ng cfDNA. Although cfDNA yields are dependent on tumour type, disease stage, moment of blood draw, and isolation method, in our hands the obtained cfDNA concentrations for the majority of 2 ml plasma samples are below this threshold even though the total amount of 10 ng is available. To increase the number of cfDNA samples compatible with MeD-seq analysis, we therefore evaluated whether it was possible to apply vacuum concentration to cfDNA samples before MeD-seq. As a first step we checked whether the increased salt concentrations after vacuum concentration of the samples influenced the enzymatic activity of the LpnPI restriction enzyme. For this purpose, we eluted genomic DNA from MCF7 cells in either AVE buffer (QIAamp kit), MW buffer (Maxwell kit) or water. Subsequently, genomic MCF7 DNA was diluted to 10 ng in 20  $\mu$ l of the respective elution buffer and the volume was reduced by vacuum concentration to 8  $\mu$ l. Unlike cfDNA, which is already fragmented, undigested genomic DNA is excluded from the library preparation due to the DNA fragment size selection step included in the protocol. Therefore, in case of incomplete digestion by LpnPI, for genomic DNA only the small fraction of digested genomic DNA molecules will be subjected to sequencing, whereas for cfDNA undigested cfDNA molecules are included in the sequencing library as well. Based on this information, incomplete digestion of genomic DNA is expected to result in increased numbers of duplicate reads passing the LpnPI-filter, whereas incomplete digestion of cfDNA results in lower numbers of reads passing the LpnPI-filter (Figure 3C and 3D). As shown in Figure 4A and 4B, vacuum concentration resulted in a higher percentage of both filtered reads and duplicate reads with MW buffer compared to both AVE buffer and water. As explained above these results suggest incomplete

digestion of the genomic DNA by LpnPI in MW buffer. MW buffer contains EDTA, which is known to inhibit metallo-enzymes by chelation of the metal ion needed for their catalytic activity (18). These results suggest that for genomic DNA in water or EDTA-free buffers it is possible to vacuum concentrate samples to achieve a minimal input of 10 ng. To subsequently test whether this is also true for cfDNA, we used 3 plasma aliquots from the same metastatic breast cancer patient sample (P71), isolated cfDNA by QIAamp and eluted the cfDNA in AVE buffer, MW buffer or water. For each buffer 10 ng of cfDNA was either analysed by MeD-seq directly or first diluted to 20 µl and vacuum concentrated to 8 µl before MeD-seq analysis. As expected, we again observed a clear indication that the enzymatic activity of LpnPI was inhibited by vacuum concentration of the MW cfDNA sample, as the percentage of reads passing the LpnPI filter was reduced (Figure 4C). Vacuum concentration of cfDNA in AVE buffer or water did not alter the percentage of LpnPI-filtered reads or duplicate reads compared to their non-concentrated control (Figure 4C and 4D). Pearson correlations between samples with and without vacuum concentration were 0.73 for cfDNA in AVE buffer, 0.72 for cfDNA in water and only 0.48 for cfDNA in MW buffer (Supplementary Table 1B). Similarly, principal component analysis showed two distinct clusters for P71 and MCF7 containing all non-concentrated samples as well as the concentrated samples in water and AVE buffer, whereas the concentrated samples in MW buffer were outliers for both genomic MCF7 DNA and cfDNA from patient P71 (Figure 4E). Together these results suggest vacuum-concentration is compatible with MeD-seq analysis but may be hindered by the presence of increased EDTA concentrations in the buffer after concentration.

#### **MeD-Seq for disease load monitoring in CRLM patients before and after surgery**

To evaluate whether genome-wide cfDNA methylation profiles are representative of tumour load, we performed MeD-seq analysis on pre- and post-operative cfDNA samples from 8 patients with operable colorectal liver metastases (CRLM). For comparison, profiles of 9 healthy blood donors (HBDs) were included as well. Seven out of 8 pre-operative samples were also analysed for KRAS,

TP53, or PIK3CA mutations by digital PCR, which were found in all 7 samples with variant allele frequencies (VAFs) of 30.2% (M1), 10.9% (M2), 27.3% (M4), 67.3% (M8), 12.9% (M10), 19.7% (M19), and 41.4% (M34) verifying the presence of ctDNA in these samples.

Principal component analysis (PCA) as well as unsupervised hierarchical clustering analysis showed that pre-operative CRLM samples were very distinct from HBDs, whereas 5 days after surgery methylation profiles were more comparable to HBDs (Figure 5A and 5B). As is shown in Figure 5C, the summarized Z-score based on all regions in all pre-surgical samples is clearly elevated (average: 31.52; range: 10.24 - 69.48) compared to HBDs (average: 0.00; range: -0.95 - 1.82), whereas the summarized Z-score in all post-surgical samples (average: 0.06; range: -1.47 - 2.91) is in the same range as those from HBDs. The summarized Z-scores before surgery were strongly correlated with the observed VAFs for KRAS, TP53, or PIK3CA mutations in the same samples (Pearson  $r = 0.90$ ,  $p = 0.006$ ), indicating the summarized genome-wide deviation in methylation profile reflects the level of ctDNA within the total pool of cfDNA.

Multiple methylation markers for (metastatic) CRC disease monitoring have already been described in literature, including ITGA4, MSC, EYA4, GRIA4, MAP3K14-AS1 (19), B4GALT1 (20), BCAT1, IKZF1 (21); (22), SEPT9, and SHOX2 (23); (24). MeD-seq results are shown for these markers in paired pre- and post-operative CRLM blood samples for patients M1, M2, M4, M8, M10, M19, M33, and M34, as well as for the corresponding CRLM tissues for patients M4, M10, and M19. (Figure 6A & Supplementary Figure S4). Distinct differences between methylation profiles were observed in pre-operative blood samples (either with available tissue samples) on one side and the post-operative blood samples on the other side for ITGA4, in 7 patients; MSC, in 6 patients; GRIA4, in 6 patients; EYA4, in 7 patients; BCAT1, in 7 patients; SEPT9, in 8 patients; and IKZF1, in 4 patients. In contrast, SHOX2, B4GALT1, and MAP3K14-AS1 showed either similar methylation levels in all samples (SHOX2) or virtually no methylation in any of the samples analysed (B4GALT1 and MAP3K14-AS1). We validated results for ITGA4, MSC, GRIA4, and EYA4 in paired pre- and post-operative blood samples from 10 CRLM patients, 8 of which were also analysed by MeDseq, using an independent method

(qMSP). ITGA4, MSC, and EYA4 showed a statistically significant decrease in CRLM patients 5 days after surgery compared to the paired baseline sample prior to surgery, whereas the HBD controls do not show any methylation for these markers. GRIA4 also showed a decrease in the same samples trending towards significance (exact sign test  $p=0.07$ ) (Figure 6B). Subsequent Pearson correlation analysis for those samples analysed both by MeD-seq and qMSP showed that for EYA4, ITGA4, and MSC results from both methods were significantly correlated (EYA4  $r = 0.78$ ,  $p=0.001$ ; MSC  $r = 0.92$ ,  $p<0.0001$ ; and ITGA4  $r = 0.59$ ,  $p=0.026$ ). MeD-seq and qMSP results for GRIA4 again showed the same trend with borderline significance ( $r = 0.48$ ,  $p=0.08$ , Supplementary figure S4). Together, these results support the reliability of the MeD-seq assay on cfDNA samples.

## DISCUSSION

This study demonstrates the feasibility of genome-wide cfDNA methylation profiling on liquid biopsies using the recently developed MeD-seq assay (16). Compatibility with different blood collection tubes, cfDNA isolation platforms, and vacuum-concentration of samples was explored to facilitate the future implementation of this method by other laboratories. To further substantiate its potential for real-time tumour load monitoring, we applied the MeD-seq assay to paired liquid biopsies of 8 patients with colorectal liver metastases before and after surgery. We related methylation values of all regions with sufficient data to their methylation status in HBDs to come to a single summarized Z-score as was described before for chromosomal aneuploidy (25). This score represents the global deviation in methylation in a patient cfDNA sample compared to a reference pool of normal cfDNAs. The potential value for this type of scoring was nicely illustrated by the high correlation between this score and the observed VAFs for known mutations before surgery as well as by the sharp decrease in genome-wide Z-scores in our 8 CRLM patients after surgery. Together these observations indicate that the global deviation in methylation profile reflects the amount of ctDNA within the pool of cfDNA.

Next to the MeD-seq we describe here, cfMeDIP-seq represents another promising method for cfDNA methylation profiling (26). With the current protocol, a similar number of reads (30-35M) is estimated to be necessary for both techniques. A major advantage of the cfMeDIP-Seq is that it only requires 1 ng cfDNA input, whereas the current MeD-seq protocol requires 10 ng. Input below 10 ng cfDNA invariably resulted in insufficient library yield in our hands (n=4). However, for most 2 ml plasma aliquots a yield of 10 ng cfDNA is feasible, especially given the potential compatibility of subsequent vacuum concentration with MeD-seq analysis we observed in a small number of samples.

Compared to cfMeDIP-seq (14), the MeD-Seq protocol requires less hands-on time and is therefore more straightforward. For MeD-seq, cfDNA samples are digested overnight, used as input for standard Illumina library preparation, size-selected and sequenced. For cfMeDIP-seq on the other hand, one needs to additionally prepare filler DNA, and purify and perform quality control on the sample after immunoprecipitation. The number of required reads for MeD-seq depends on the number of reads passing the LpnPI filter, which is lower in fragmented cfDNA compared to genomic DNA due to the presence of undigested cfDNA fragments in the same size range as the digested fragments. In that respect, selection of digested cfDNA from undigested cfDNA as incorporated in the recently described cfDNA-RRBS protocol may also represent a valuable addition to our current MeD-seq protocol to reduce the number of background reads (12, 13)). Although we did not perform a head-to-head comparison, theoretically MeD-seq is able to give a higher and less biased overall coverage of CpG dinucleotides (15, 16).

In our view MeD-seq analysis of cfDNA has 2 distinct potential applications: 1) discovery of relevant DMRs for the development of subsequent marker panels, and 2) direct use as diagnostic assay. In literature so far 10 methylation markers have been described for disease load monitoring and/or detection of minimal residual disease in liquid biopsies of CRC patients, namely EYA4, GRIA4, ITGA4, MAP3K14-AS1, MSC ((19)), SEPT9, SHOX2 ((23)), BCAT1, IKFZ1 (21) (22), and B4GALT1 (20). With MeD-seq, we detected differentially methylated regions between pre- and post-operative samples

for EYA4, GRIA4, ITGA4, and MSC, which we validated with qMSP. Furthermore, MeD-seq detected differentially methylated regions for BCAT1, SEPT9 and IKZF1 but not for B4GALT1, MAP3K14-AS1 and SHOX2.

Although we only had 8 paired patient samples in our proof of principle experiment, the MeD-seq assay can be used for direct discovery screens on cfDNA instead of tissues or cell lines to identify additional, perhaps even more relevant, markers for liquid biopsy-based disease monitoring in CRC patients.

Next to discovery of disease-specific biomarkers in cfDNA, one could also envision the direct clinical implementation of the MeD-seq approach to generate genome-wide cfDNA methylation profiles for patients over time. Although this is more expensive than the application of targeted panels by PCR-based methods, costs for cfDNA MeD-seq are comparable to that of targeted cfDNA mutation panels as well as to costs associated with a standard CT-scan of the thorax and abdomen. Results in literature so far show that cfDNA methylation profiling may show an increased overall sensitivity for disease detection, longitudinal disease monitoring, and tumour classification(26); (10).

## CONCLUSIONS

In conclusion, we here present a novel method for cfDNA methylation profiling and show that this method is compatible with 10 ng of cfDNA isolated manually by QIAamp or semi-automated by Maxwell from plasma obtained from EDTA or CellSave blood collection tubes. The potential of the MeD-seq assay is shown by the obtained paired cfDNA methylation profiles in CRLM patients before and after surgery and their comparison to cfDNA methylation profiles in HBDs. Our assay provides a suitable tool both for the discovery of methylation markers in cfDNA samples and direct monitoring of tumour load in metastatic cancer patients.

## MATERIALS & METHODS

## Cell lines and patient samples

For optimization experiments genomic DNA from MCF7 cells was used, which were obtained from the American Type Culture Collection (ATCC, Manassas, VA). MCF7 cells were cultured in Gibco™ RPMI 1640 glutamax (Thermo Fisher Scientific, Waltham, MA) supplemented with 10% heat-inactivated fetal bovine serum, 80µg/ml streptomycin, and 100µg/ml penicillin G.

Coded metastatic cancer patient samples were obtained from various clinical studies, all of which were approved by the Medical Ethics Committee from the Erasmus University Medical Center (MEC 17-238, MEC 15-289, and MEC 16-499). In short, 10 ml of blood was collected from patients in EDTA tubes, stabilizing CellSave tubes (Menarini Silicon Biosystems, Castel Maggiore, Italy), or simultaneously in both tube types. In addition, 10 ml of blood was obtained from 9 consenting anonymous healthy blood donors (HBDs; 5 females and 4 males) via the Dutch National blood bank (Sanquin) in CellSave tubes. Plasma was isolated from the obtained blood within 24 hours (EDTA) or 96 hours (CellSave) after blood draw by 2 sequential centrifugation steps at room temperature (10 minutes at 1711g followed by 10 minutes at 12000g) and stored at –80 °C (27).

## (cf)DNA isolations and quantification

Genomic DNA from MCF7 cells was isolated by proteinase K digestion at 65°C for 30 minutes followed by purification using the QIAamp circulating nucleic acid kit (Qiagen, Venlo, The Netherlands). Genomic DNA from frozen tissue sections of colorectal liver metastases was isolated using the NucleoSpin Tissue kit according to the manufacturer's guidelines. cfDNA was isolated from 2 ml of plasma using either the manual QIAamp circulating nucleic acid kit (Qiagen), or the semi-automated QIAasymphony DSP Circulating DNA Kit (Qiagen) and Maxwell® RSC ccfDNA Plasma Kit (Promega, Leiden, the Netherlands). DNA was eluted in elution buffers provided by the kits used (QIAamp kit: AVE buffer (RNase-free water with 0.04% NaN<sub>3</sub>), QiaSymphony kit: ATE buffer (10 mM Tris-HCl pH 8.3, 0.1 mM EDTA, and 0.04% NaN<sub>3</sub>), Maxwell buffer (10mM Tris, 0.1mM EDTA, pH 9.0)) or RNase-free water as specified.



377

# 378 **MeD-seq assay**

379 MeD-seq assays were essentially performed as previously described (16). In short, 8 µl genomic DNA  
380 (input ranged from 117-1728 ng) from frozen tissues, specified amounts of MCF7 genomic DNA or  
381 plasma-derived cfDNA were digested with LpnPI (New England Biolabs, Ipswich, MA) yielding 32 bp  
382 fragments around the fully methylated recognition site containing a CpG. Samples were prepped for  
383 sequencing using the ThruPLEX DNA-seq 96D kit (Rubicon Genomics, Takara Bio Europe, Saint-  
384 Germain-en-Laye, France) and purified on a Pippin HT system with 3% agarose gel cassettes (Sage  
385 Science, Beverly, MA). Libraries were multiplexed and sequenced on an Illumina HiSeq 2500 for 50  
386 bp single reads according to the manufacturer's instructions (Illumina, San Diego, CA). Samples were  
387 first sequenced until ~2M reads and continued to a total of ~20M reads only when the fraction of  
388 reads that passed the LpnPI filter (explained below) was at least 20%.

389

# 390 **Quantitative Methylation Specific PCR (qMSP)**

391 The DNA methylation status of the CpG-island containing promoter regions of MSC, ITGA4, GRIA4,  
392 and EYA4 was determined by qMSP analysis on sodium bisulfite-treated cfDNA obtained before and  
393 5 days after surgery of 18 CRLM patients as well as 3 HBDs. In brief, 5 ng cfDNA was modified using  
394 the EZ DNA Methylation kit (Zymo Research, Orange, CA), which induces chemical conversion of  
395 unmethylated cytosines into uracils. Specific primers were designed to amplify the methylated DNA  
396 sequence of all 3 promoter regions and resulting amplicons were quantified using TaqMan probes  
397 (Table 1). In addition, the modified, unmethylated sequence of the housekeeping gene β-actin  
398 (ACTB) was amplified as a reference (28). ACTB and MSC reactions were combined into a duplex  
399 reaction as were ITGA4 and GRIA4 reactions, whereas EYA4 reactions were performed separately.  
400 qMSP reactions were carried out in a 12.5 µl reaction volume containing 3µl of bisulfite-treated  
401 cfDNA, 300 nM (ACTB, MSC, ITGA4, GRIA4) or 500 nM (EYA4) of each primer, 250 nM probe, 6.25 µl  
402 2x EpiTect MethyLight Master Mix (w/o ROX), and 1µl 50x ROX Dye Solution using the Mx3000P and

Mx3005P QPCR Systems (Stratagene, La Jolla, CA). Only samples with a Ct for ACTB below 32 were included for data analysis to ensure sufficient DNA quality and quantity, resulting in paired data for 10 CRLM patients. Methylation values of the 3 target regions were normalized to the reference gene ACTB using the comparative Ct method (2- $\Delta$ Ct) (29) and subsequently square root transformed to reduce skewness in the data distribution.

408

409 **Table 1:** Primer and probe sequences. CpG dinucleotides are bold and underlined.

| Gene  | Detection             | oligonucleotide                             | Sequence 5'to 3'                                                                                                                                                                                                        | Amplicon length (bp) | Annealing temperature (°C) |
|-------|-----------------------|---------------------------------------------|-------------------------------------------------------------------------------------------------------------------------------------------------------------------------------------------------------------------------|----------------------|----------------------------|
| ITGA4 | Promotor methylation  | Forward<br>Reverse<br>Probe                 | TAGTT <u><b>CG</b></u> TTGG <u><b>CG</b></u> T <u><b>CG</b></u> GATAC<br>TACCCCAAAATTACA <u><b>CG</b></u> AAATA <u><b>CG</b></u><br>GGGG <u><b>CG</b></u> TTTTTTTT <u><b>CG</b></u> TTGGTTAAT <u><b>CG</b></u>          | 90                   | 60                         |
| MSC   | Promotor methylation  | Forward<br>Reverse<br>Probe                 | GGTTGGTTTTAGTTATAT <u><b>CG</b></u> TTATTTG <u><b>C</b></u><br>TACCAAATTCATAAATACA <u><b>CG</b></u> TAAC <u><b>CG</b></u><br><u><b>CG</b></u> ATCCTCCTACAACAA (MGB*)                                                    | 89                   | 62                         |
| EYA4  | Promotor methylation  | Forward<br>Reverse<br>Probe                 | TTTTTTTAAGGTAG <u><b>CG</b></u> ATAATTTT <u><b>AC</b></u><br>CAAATACGAAACTAC <u><b>CG</b></u> ACAA <u><b>CG</b></u><br><u><b>ACG</b></u> CA <u><b>CG</b></u> CTC <u><b>CG</b></u> AC (MGB*)                             | 104                  | 60                         |
| GRIA4 | Promotor methylation  | Forward<br>Reverse<br>Probe                 | TGTTTAT <u><b>CG</b></u> GAG <u><b>CG</b></u> TTTTAGTTTT <u><b>C</b></u><br>AAT <u><b>CG</b></u> ATCCCTCTA <u><b>CG</b></u> AAC <u><b>CG</b></u><br><u><b>CG</b></u> TTT <u><b>CG</b></u> GAGTTAGTTTGGTGTTAGGTTTTTTTTTT | 120                  | 60                         |
| ACTB  | Bi-sulfite conversion | Forward<br>Reverse<br>Probe                 | AACCAATAAAACCTACTCCTCCCTTAA<br>TGGTGATGGAGGAGGTTTAGTAAGT<br>ACCACCACCAACACACAATAACAAACACA                                                                                                                               | 133                  | 62                         |
| TP53  | R273C VAF             | Forward<br>Reverse<br>Probe-WT<br>Probe-Mut | CTCTGTGCGCCGGTCTCT<br>TGGGACGGAACAGCTTTGA<br>AGGCACAAACACGCAC<br>AGGCACAAACACACA                                                                                                                                        | 62                   | 56                         |

410 \*MGB: Minor Groove Binder; bp: base pairs; CpG dinucleotides are bold and underlined

411

## 412 Digital PCR (dPCR)

413 The presence of KRAS, TP53, and PIK3CA mutations in pre-surgical cfDNA of 7 CRLM patients was  
414 evaluated using digital PCR (dPCR). For KRAS, variant allele frequencies were determined by KRAS  
415 G12 and G13 mutation specific assays (Thermo Fisher Scientific) for patients M2, M4 and M19,

whereas a KRAS mutation screening kit (Biorad, Hercules, CA) was applied to patient M10. The KRAS genotype was determined either directly in 7.5 µl cfDNA (patient M4) or after pre-amplification of 2 µl cfDNA (patients M2, M10, and M19). For TP53 R273 a mutation specific assay (Table 1) was designed to determine the variant allele frequencies in patients M1 and M8. For PIK3CA, the variant allele frequency was determined by the PIK3CA H1047 mutation specific assay (Thermo Fisher Scientific) for patient M34. The dPCR-analyses were performed either on a QuantStudio 3D dPCR system (Thermo Fisher Scientific) or a Naica System (Stilla Technologies, Villejuif, France). Pre-amplification and QuantStudio dPCR analyses were performed as described previously (30). Regarding the Naica system, up to 8 µl (pre-amplified) cfDNA was loaded onto the chip in the presence of a final concentration of 1x Perfecta MultiPlex ToughMix (QuantaBio, Beverly, MA, USA), 100 nM Fluorescein (VWR, Leicestershire, UK) and 1x FAM [mutant]/VIC [wild-type] labelled KRAS probe assays. After partitioning the sample into 30,000 crystals, the DNA copies were amplified in 45 PCR cycles (95°C for 10 minutes, followed by 45 cycles of 95°C for 30 seconds and 52 or 58°C for 15 seconds). After PCR, the acquired fluorescence data were analyzed with the CrystalMiner software version 1.6 (Stilla Technologies).

## **Data processing**

Dual indexed samples were demultiplexed using bcl2fastq software (Illumina). Subsequent data processing was carried out using specifically created scripts in Python, which include a trimming step to remove the Illumina adapters and a filtering step based on LpnPI restriction site occurrence between 13 and 17 bp from the 5'- or 3' end of the read, after which DNA fragments which were methylated remain (Figure 1) (16). Reads passing the filter were mapped to the genome using Bowtie 2 (31). Using all unambiguously mapped reads, count scores were assigned to each individual LpnPI site in the genome. Outcome measures for a technically successful MeD-seq analysis include the following: 1) total number of obtained reads, 2) fraction of reads passing the LpnPI filter, and 3) the fraction of duplicate reads.

Subsequently, count scores for individual CpG sites were summarized into 2 kilobase (kb) regions surrounding all known transcription start sites (TSS) annotated in ENSEMBL, resulting in 57278 regions located on the autosomal chromosomes. After normalization (counts per million) using the total number of reads passing the LpnPI filter per sample, square root transformation was applied to reduce skewness in the data distribution. Regions with 0 counts in more than 25% of samples were removed, resulting in 39386 regions for CRLM samples (9 HBDs; 8 pre-surgical cfDNAs samples from CRLM patients) and 38879 regions for breast cancer samples (9 HBDs; 3 pre-vacuum samples eluted in AVE, H2O, and MW-buffer, 4 MCF7 samples) for further data analysis.

## **Data analysis and statistical testing**

### *Principal component analyses*

Principal component analysis (PCA) was performed on the 50% most variable regions to reduce the dimensionality of the data. The normalized and transformed data were mean-centered and subsequently reduced to two principal components using the Singular Value Decomposition function (svd) in R v.3.6.3.

### *Genome-wide Z-score calculation*

To generate one overall score for aberrant cfDNA methylation per patient sample, Z-scores were first calculated per region by subtracting the mean and dividing by the standard deviation of that respective region in a panel of nine healthy controls (HBDs). Resulting Z-scores per region were squared and summed for both patient samples and HBDs to get a genome-wide Z-score as described previously (25). For HBDs genome-wide Z-scores were calculated using a leave-one-out approach, in which one sample was compared to the remaining healthy controls. Calculations were performed in R v3.6.3 ([www.R-project.org](http://www.R-project.org)).

### *Additional analyses*

Technical outcome measures from the MeD-seq assay were compared between groups using the chi-square or Mann-Whitney U test depending on the type of variable. Paired pre- and post-surgical

qMSP data were analysed using the paired-samples sign test. These analyses were performed in IBM SPSS Statistics 25 and two-sided p values <0.05 were considered statistically significant. Pearson correlation analyses between DNA methylation profiles were performed using R v3.6.3 ([www.R-project.org](http://www.R-project.org)).

## **DECLARATIONS**

### **Ethics approval and consent to participate**

Coded metastatic cancer patient samples were obtained from various clinical studies (MEC 17-238, MEC 15-289, and MEC 16-499), all of which were approved by the Medical Ethics Committee from the Erasmus University Medical Center. All patients signed an informed consent.

### **Consent for publication**

Not applicable

### **Availability of data and materials**

The dataset supporting the conclusions of this article is available in the NCBI Sequence Read Archive (SRA; <https://www.ncbi.nlm.nih.gov/sra>) under accession number SUB9929930.

### **Competing interests**

The authors declare no conflict of interest or financial interests except for RB, JB, WvIJ and JG, who report being shareholder in Methylomics B.V., a commercial company that applies MeD-seq to develop methylation markers for cancer staging.

### **Funding**

This research was funded by the Dutch Cancer Society (KWF-6331), the Erasmus MC Mrcace internal grant program, the Dutch Digestive Foundation (MLDS-SK18-02), and the Cancer Genomics Center, the Netherlands (CGC.nl). TD was financed by the Daniel den Hoed foundation.

# **Authors' contributions**

TD, RB, VdW, ZA, WvIJ, and MMJvdP performed the described experiments. JB, TD, RB, WvIJ and SW were involved in bioinformatical and statistical data analysis. TD, RB, JG, JWMM, and SW wrote the manuscript. LA, DJG, LFvD, MPJKL, CV, and SS conducted the clinical studies and made samples available to this study. LA, SS, CV, JWMM, JG, and SW conceived the study and obtained the necessary funds for execution of the study.

# **Acknowledgements**

We highly appreciate the help of Jean Helmijr and Maurice Jansen with the digital PCR analyses.

## Figure legends

### Figure 1 – Schematic workflow of MeD-seq on cfDNA.

**A.** The LpnPI endonuclease recognizes methylated CpG motifs and incises the DNA 16 bp upstream and downstream to generate 32bp fragments. **B.** After adaptor ligation, size fractionation is performed using the Pippin HT platform. **C.** All fragments of the selected size are amplified by PCR and sequenced. Only fragments with a CpG on the central position pass the filter and are considered as methylated reads. Green: LpnPI endonuclease, Black tabs: Cpg-site, Red circles: CpG methylation.

### Figure 2 – Principal Component Analysis of MeD-seq cfDNA methylation profiles using different blood tubes and input amounts

Principal components were calculated for cfDNA methylation profiles of 3 patients from which blood was collected at the same time in EDTA and CellSave tubes and either 10 ng cfDNA or the maximal input of 8 µl DNA was used. The maximal input amount was kept equal for EDTA and CellSave within 1 patient. PC1 and PC2, with the explained variances, are shown on the x-axis and y-axis respectively. Samples from the same patient are indicated by the shapes used, where each icon represents 1 cfDNA sample (patient M4 by ▲, patient M10 by ■, and patient M19 by ▢). In **A.** samples are coloured based on the tube the blood was collected in (EDTA in black and CellSave in red). In **B.** samples are coloured based on the cfDNA input amount used, 10 g in black and maximum input in red (>30 ng).

### Figure 3 – The compatibility of different isolation methods with MeD-seq analysis

In **A.** and **B.** percentages of LpnPI filtered reads and duplicate reads are shown for QIAamp (n=45) and QiaSymphony (n=37) isolated cfDNA samples. In **C.** and **D.** filtered reads and duplicate reads are shown of cfDNA isolated from aliquots of the same plasma from patients M12 (black) and M69 (grey) by QIAamp, QiaSymphony, and Maxwell. In **E.** and **F.** a significantly lower percentage of filtered and duplicate reads is shown for cfDNA compared to gDNA samples. In **G.** and **H.** filtered

reads and duplicate reads are shown for genomic MCF7 DNA in the different elution buffers. \*\*\*:  $P \leq 0.001$ , AVE buffer (QIAamp): RNase-free water with 0.04% NaN<sub>3</sub>; ATE buffer (QiaSymphony): 10 mM Tris-HCl pH 8.3, 0.1 mM EDTA, and 0.04% NaN<sub>3</sub>; MW buffer (Maxwell): 10 mM Tris, 0.1 mM EDTA, pH 9.0.

#### **Figure 4 – The compatibility of vacuum concentrated samples in different buffers with MeD-seq analysis**

The top two panels show results for 10 ng of genomic MCF7 DNA dissolved in AVE buffer, water, or Maxwell elution buffer analysed by MeD-seq with and without preceding vacuum concentration of the sample. In **A.** the percentage of Lpnpl filtered reads and in **B.** the percentage of duplicate reads is shown for the different elution buffers with (in black) and without (in grey) vacuum concentration. The middle two panels show results for different aliquots of 10 ng cfDNA from the same plasma sample dissolved in AVE buffer, water, or Maxwell elution buffer analysed by MeD-seq with and without preceding vacuum concentration of the sample. In **C.** the percentage of Lpnpl filtered reads and in **D.** the percentage of duplicate reads is shown for the different elution buffers with (in black) and without (in grey) vacuum concentration. **E.** Principal components were calculated for cfDNA methylation profiles of genomic MCF7 DNA and 3 plasma aliquots from a single metastatic breast cancer patient dissolved in AVE (■), H<sub>2</sub>O (▲), MW (▣) buffer with and without vacuum concentration. PC1 and PC2, with the explained variances, are shown on the x-axis and y-axis respectively. Each icon represents 1 cfDNA sample: samples coloured in red and black were vacuum-concentrated whereas samples in orange and purple were not.

#### **Figure 5 – Comparision of cfDNA methylation profiles from HBDs and CRLM patients before and after surgery.**

**A.** Principal components were calculated for cfDNA methylation profiles of 9 HBDs (4 males and 5 females; in black) and a pre- (BL; in red) and postoperative (+5d; in orange) sample of 8 CRLM



patients. PC1 and PC2, with the explained variances, are shown on the x-axis and y-axis respectively. Shapes represent patients, where each icon represents 1 cfDNA sample. **B.** Unsupervised hierarchical clustering of methylation profiles again shows a distinct cluster for pre-operative CRLM samples (red). HBDs (black) and post-operative CRLM samples (orange) show more similar methylation profiles. **C.** Obtained methylation profiles were summarized in a genome-wide Z-score as an overall measure for the deviation of the sample from the average normal methylation profile in HBDs. Pre-operative genome-wide Z-scores are depicted in grey and post-operative genome-wide Z-scores in black.

**Figure 6 – MeD-seq results for published biomarkers on cfDNA from HBDs and paired tissue, pre-operative and post-operative cfDNA from CRLM patients.**

**A.** Sequenced MeD-seq reads for EYA4, GRIA4, MSC, and ITGA4 of CRLM tissue (white), pre-operative cfDNA (red), and post-operative cfDNA (orange) from CRLM-patients and HBDs (black). Results are visualized in Integrative Genomics Viewer (IGV) v.2.9.4. The green bars indicate the locations of the respective qMSP amplicons.

**B.** qMSP-based methylation levels relative to the ACTB reference gene are shown for EYA4 (top-left), GRIA4 (top-right), MSC (bottom-left), and ITGA4 (bottom-right) at baseline (BL) and 5 days post-surgery (+5d) in cfDNA of 10 CRLM patients and 3 healthy blood donors (HBDs). A median decrease in methylation levels was observed for EYA4, GRIA4, MSC, and ITGA4 5 days after surgery compared to BL in CRLM patients (exact sign test;  $p=0.004$ ,  $p=0.07$ ,  $p=0.002$ , and  $p=0.039$ , respectively).

**Supplementary Figure S1 – The compatibility of different blood collection tubes with MeD-seq analysis**

Percentages of **A.** LpnPI filtered reads and **B.** duplicate reads are shown for EDTA and CellSave tubes obtained during the same blood draw from 3 patients. For each sample 10 ng cfDNA and maximal

cfDNA input in 8  $\mu$ l (>10ng) was analysed, in which the maximal amount was kept equal between EDTA and CellSave per patient.

## **Supplementary Figure S2 - Observed correlations between biological replicates compared to HBDs**

Boxplots show significant higher Pearson's  $r$  between biological replicates per patient ( $n=4$ ), in white, compared to the Pearson's  $r$  between these samples and unrelated HBD samples ( $n=9$ ), in gray (Mann-Whitney U,  $p = 0.015$  for M4,  $p=0.004$  for M10, and  $p<0.001$  for M19). Biological duplicates were taken during the same blood draw using either EDTA or CellSave tubes, of which either 10 ng or the maximum yield in 8  $\mu$ l was used for MeD-seq.

## **Supplementary Figure S3 – Leukocyte specific markers in HBDs.**

A heat map of a subset of leukocyte specific methylation markers described by Accomando et al.(17) show consistent methylation patterns across the included healthy blood donors. Only regions showing at least 1 read in 9 HBD samples are included.

## **Supplementary Figure S4 – MeD-seq results for published biomarkers on cfDNA from HBDs and paired tissue, pre-operative and post-operative cfDNA from CRLM patients.**

Sequenced MeD-seq reads shown for BCAT1, IKZF1, SEPT9, B4GALT1, MAP3K14-AS1 and SHOX2 from pre-operative cfDNA (red) and post-operative cfDNA (orange) of CRLM-patients and cfDNA samples of HBDs (black). Results are visualized in Integrative Genomics Viewer (IGV) v.2.9.4.

## **Supplementary Figure S5 – Correlation between MeD-seq and qMSP for previously identified markers for CRLM.**

Scatterplots showing the Pearson correlations between MeD-seq and qMSP results for **A.** EYA4, **B.** GRIA4, **C.** MSC, and **D.** ITGA4.

612

613

614

# 615 References

- 616 1. Lianidou E, Pantel K. Liquid biopsies. *Genes Chromosomes Cancer*. 2019;58(4):219-32.
- 617 2. Palmirotta R, Lovero D, Cafforio P, Felici C, Mannavola F, Pellè E, et al. Liquid biopsy of  
618 cancer: a multimodal diagnostic tool in clinical oncology. *Ther Adv Med Oncol*.  
619 2018;10:1758835918794630.
- 620 3. Abbosh C, Birkbak NJ, Wilson GA, Jamal-Hanjani M, Constantin T, Salari R, et al. Phylogenetic  
621 ctDNA analysis depicts early-stage lung cancer evolution. *Nature*. 2017;545(7655):446-51.
- 622 4. O'Leary B, Hrebien S, Morden JP, Beaney M, Friibens C, Huang X, et al. Early circulating  
623 tumor DNA dynamics and clonal selection with palbociclib and fulvestrant for breast cancer. *Nat*  
624 *Commun*. 2018;9(1):896.
- 625 5. van Helden EJ, Angus L, Menke-van der Houven van Oordt CW, Heideman DAM, Boon E, van  
626 Es SC, et al. RAS and BRAF mutations in cell-free DNA are predictive for outcome of cetuximab  
627 monotherapy in patients with tissue-tested RAS wild-type advanced colorectal cancer. *Mol Oncol*.  
628 2019;13(11):2361-74.
- 629 6. Razavi P, Li BT, Brown DN, Jung B, Hubbell E, Shen R, et al. High-intensity sequencing reveals  
630 the sources of plasma circulating cell-free DNA variants. *Nat Med*. 2019;25(12):1928-37.
- 631 7. Chan HT, Nagayama S, Chin YM, Otaki M, Hayashi R, Kiyotani K, et al. Clinical significance of  
632 clonal hematopoiesis in the interpretation of blood liquid biopsy. *Mol Oncol*. 2020;14(8):1719-30.
- 633 8. McMahon KW, Karunasena E, Ahuja N. The Roles of DNA Methylation in the Stages of  
634 Cancer. *Cancer J*. 2017;23(5):257-61.
- 635 9. Moss J, Magenheim J, Neiman D, Zemmour H, Loyfer N, Korach A, et al. Comprehensive  
636 human cell-type methylation atlas reveals origins of circulating cell-free DNA in health and disease.  
637 *Nat Commun*. 2018;9(1):5068.
- 638 10. Liu MC, Oxnard GR, Klein EA, Swanton C, Seiden MV, Consortium C. Sensitive and specific  
639 multi-cancer detection and localization using methylation signatures in cell-free DNA. *Ann Oncol*.  
640 2020;31(6):745-59.
- 641 11. Worm Ørntoft MB, Jensen S, Hansen TB, Bramsen JB, Andersen CL. Comparative analysis of  
642 12 different kits for bisulfite conversion of circulating cell-free DNA. *Epigenetics*. 2017;12(8):626-36.
- 643 12. De Koker A, Van Paemel R, De Wilde B, De Preter K, Callewaert N. A versatile method for  
644 circulating cell-free DNA methylome profiling by reduced representation bisulfite sequencing.  
645 *bioRxiv*. 2019:663195.
- 646 13. Van Paemel R, De Koker A, Vandeputte C, van Zogchel L, Lammens T, Laureys G, et al.  
647 Minimally invasive classification of paediatric solid tumours using reduced representation bisulphite  
648 sequencing of cell-free DNA: a proof-of-principle study. *Epigenetics*. 2020:1-13.
- 649 14. Shen SY, Burgener JM, Bratman SV, De Carvalho DD. Preparation of cfMeDIP-seq libraries for  
650 methylome profiling of plasma cell-free DNA. *Nat Protoc*. 2019;14(10):2749-80.
- 651 15. Bock C, Tomazou EM, Brinkman AB, Müller F, Simmer F, Gu H, et al. Quantitative comparison  
652 of genome-wide DNA methylation mapping technologies. *Nat Biotechnol*. 2010;28(10):1106-14.
- 653 16. Boers R, Boers J, de Hoon B, Kockx C, Ozgur Z, Molijn A, et al. Genome-wide DNA  
654 methylation profiling using the methylation-dependent restriction enzyme LpnPI. *Genome Res*.  
655 2018;28(1):88-99.
- 656 17. Accomando WP, Wiencke JK, Houseman EA, Nelson HH, Kelsey KT. Quantitative  
657 reconstruction of leukocyte subsets using DNA methylation. *Genome Biology*. 2014;15(3):R50.

18. Tokuda Y, Nakamura T, Satonaka K, Maeda S, Doi K, Baba S, et al. Fundamental study on the mechanism of DNA degradation in tissues fixed in formaldehyde. *J Clin Pathol*. 1990;43(9):748-51.
19. Barault L, Amatu A, Siravegna G, Ponzetti A, Moran S, Cassingena A, et al. Discovery of methylated circulating DNA biomarkers for comprehensive non-invasive monitoring of treatment response in metastatic colorectal cancer. *Gut*. 2018;67(11):1995-2005.
20. Picardo F, Romanelli A, Muinelo-Romay L, Mazza T, Fusilli C, Parrella P, et al. Diagnostic and Prognostic Value of B4GALT1 Hypermethylation and Its Clinical Significance as a Novel Circulating Cell-Free DNA Biomarker in Colorectal Cancer. *Cancers (Basel)*. 2019;11(10).
21. Symonds EL, Pedersen SK, Murray DH, Jedi M, Byrne SE, Rabbitt P, et al. Circulating tumour DNA for monitoring colorectal cancer-a prospective cohort study to assess relationship to tissue methylation, cancer characteristics and surgical resection. *Clin Epigenetics*. 2018;10:63.
22. Murray DH, Symonds EL, Young GP, Byrne S, Rabbitt P, Roy A, et al. Relationship between post-surgery detection of methylated circulating tumor DNA with risk of residual disease and recurrence-free survival. *J Cancer Res Clin Oncol*. 2018;144(9):1741-50.
23. Bergheim J, Semaan A, Gevensleben H, Groening S, Knoblich A, Dietrich J, et al. Potential of quantitative SEPT9 and SHOX2 methylation in plasmatic circulating cell-free DNA as auxiliary staging parameter in colorectal cancer: a prospective observational cohort study. *Br J Cancer*. 2018;118(9):1217-28.
24. Leon Arellano M, García-Arranz M, Ruiz R, Olivera R, Magallares S, Olmedillas-Lopez S, et al. A First Step to a Biomarker of Curative Surgery in Colorectal Cancer by Liquid Biopsy of Methylated Septin 9 Gene. *Dis Markers*. 2020;2020:9761406.
25. Belic J, Koch M, Ulz P, Auer M, Gerhalter T, Mohan S, et al. mFast-SeqS as a Monitoring and Pre-screening Tool for Tumor-Specific Aneuploidy in Plasma DNA. *Adv Exp Med Biol*. 2016;924:147-55.
26. Shen SY, Singhanian R, Fehringer G, Chakravarthy A, Roehrl MHA, Chadwick D, et al. Sensitive tumour detection and classification using plasma cell-free DNA methylomes. *Nature*. 2018;563(7732):579-83.
27. van Dessel LF, Beije N, Helmijs JC, Vitale SR, Kraan J, Look MP, et al. Application of circulating tumor DNA in prospective clinical oncology trials - standardization of preanalytical conditions. *Mol Oncol*. 2017;11(3):295-304.
28. Harden SV, Guo Z, Epstein JI, Sidransky D. Quantitative GSTP1 methylation clearly distinguishes benign prostatic tissue and limited prostate adenocarcinoma. *J Urol*. 2003;169(3):1138-42.
29. Schmittgen TD, Livak KJ. Analyzing real-time PCR data by the comparative C(T) method. *Nat Protoc*. 2008;3(6):1101-8.
30. Vitale SR, Sieuwerts AM, Beije N, Kraan J, Angus L, Mostert B, et al. An Optimized Workflow to Evaluate Estrogen Receptor Gene Mutations in Small Amounts of Cell-Free DNA. *J Mol Diagn*. 2019;21(1):123-37.
31. Langmead B, Salzberg SL. Fast gapped-read alignment with Bowtie 2. *Nat Methods*. 2012;9(4):357-9.

Figure 1

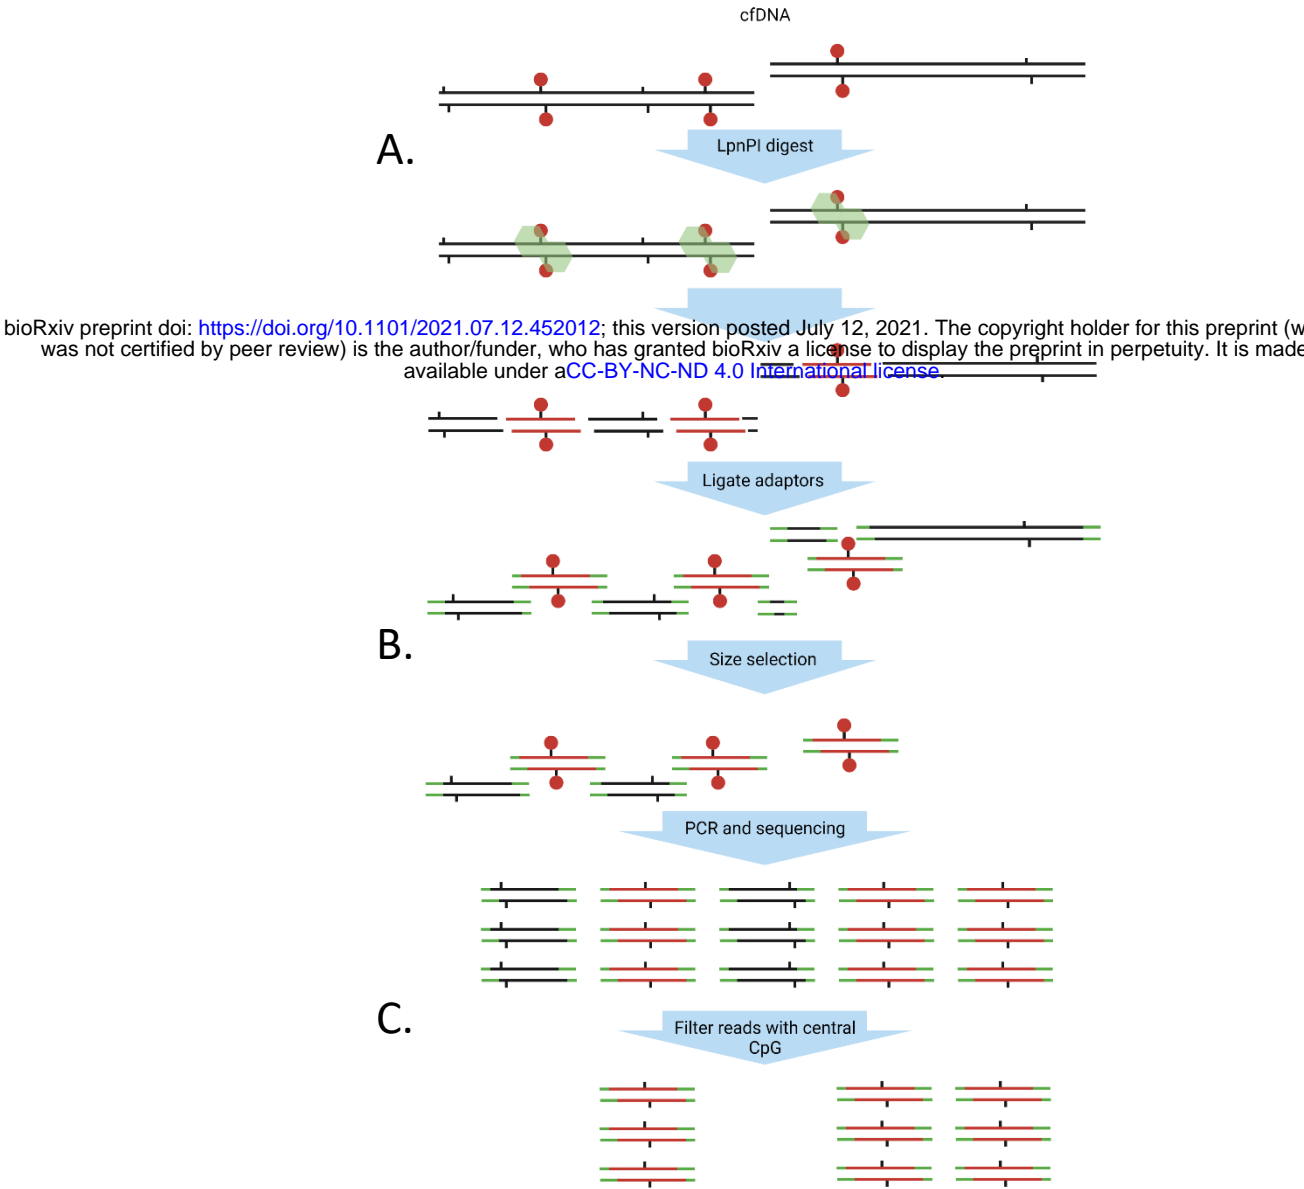

Figure 2

A.

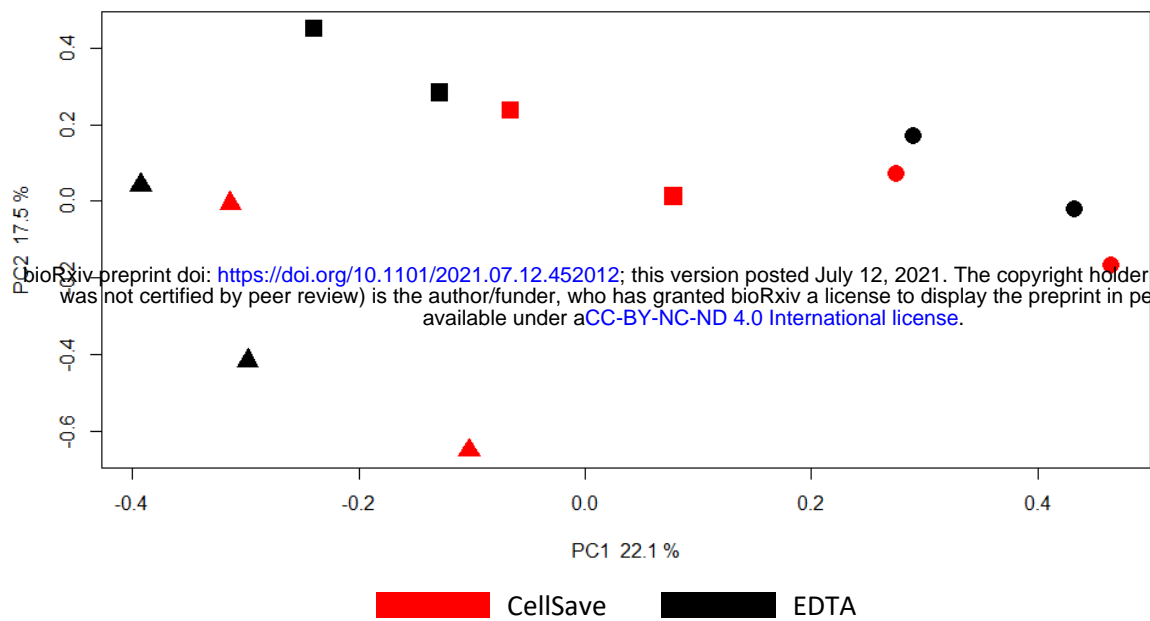

B.

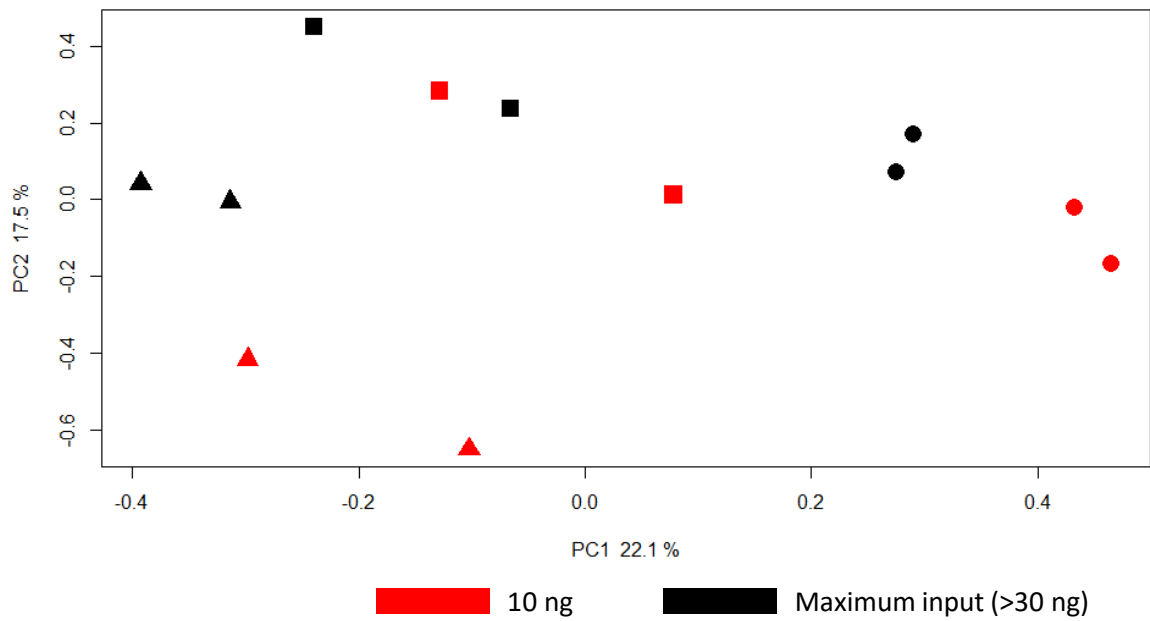

Figure 3

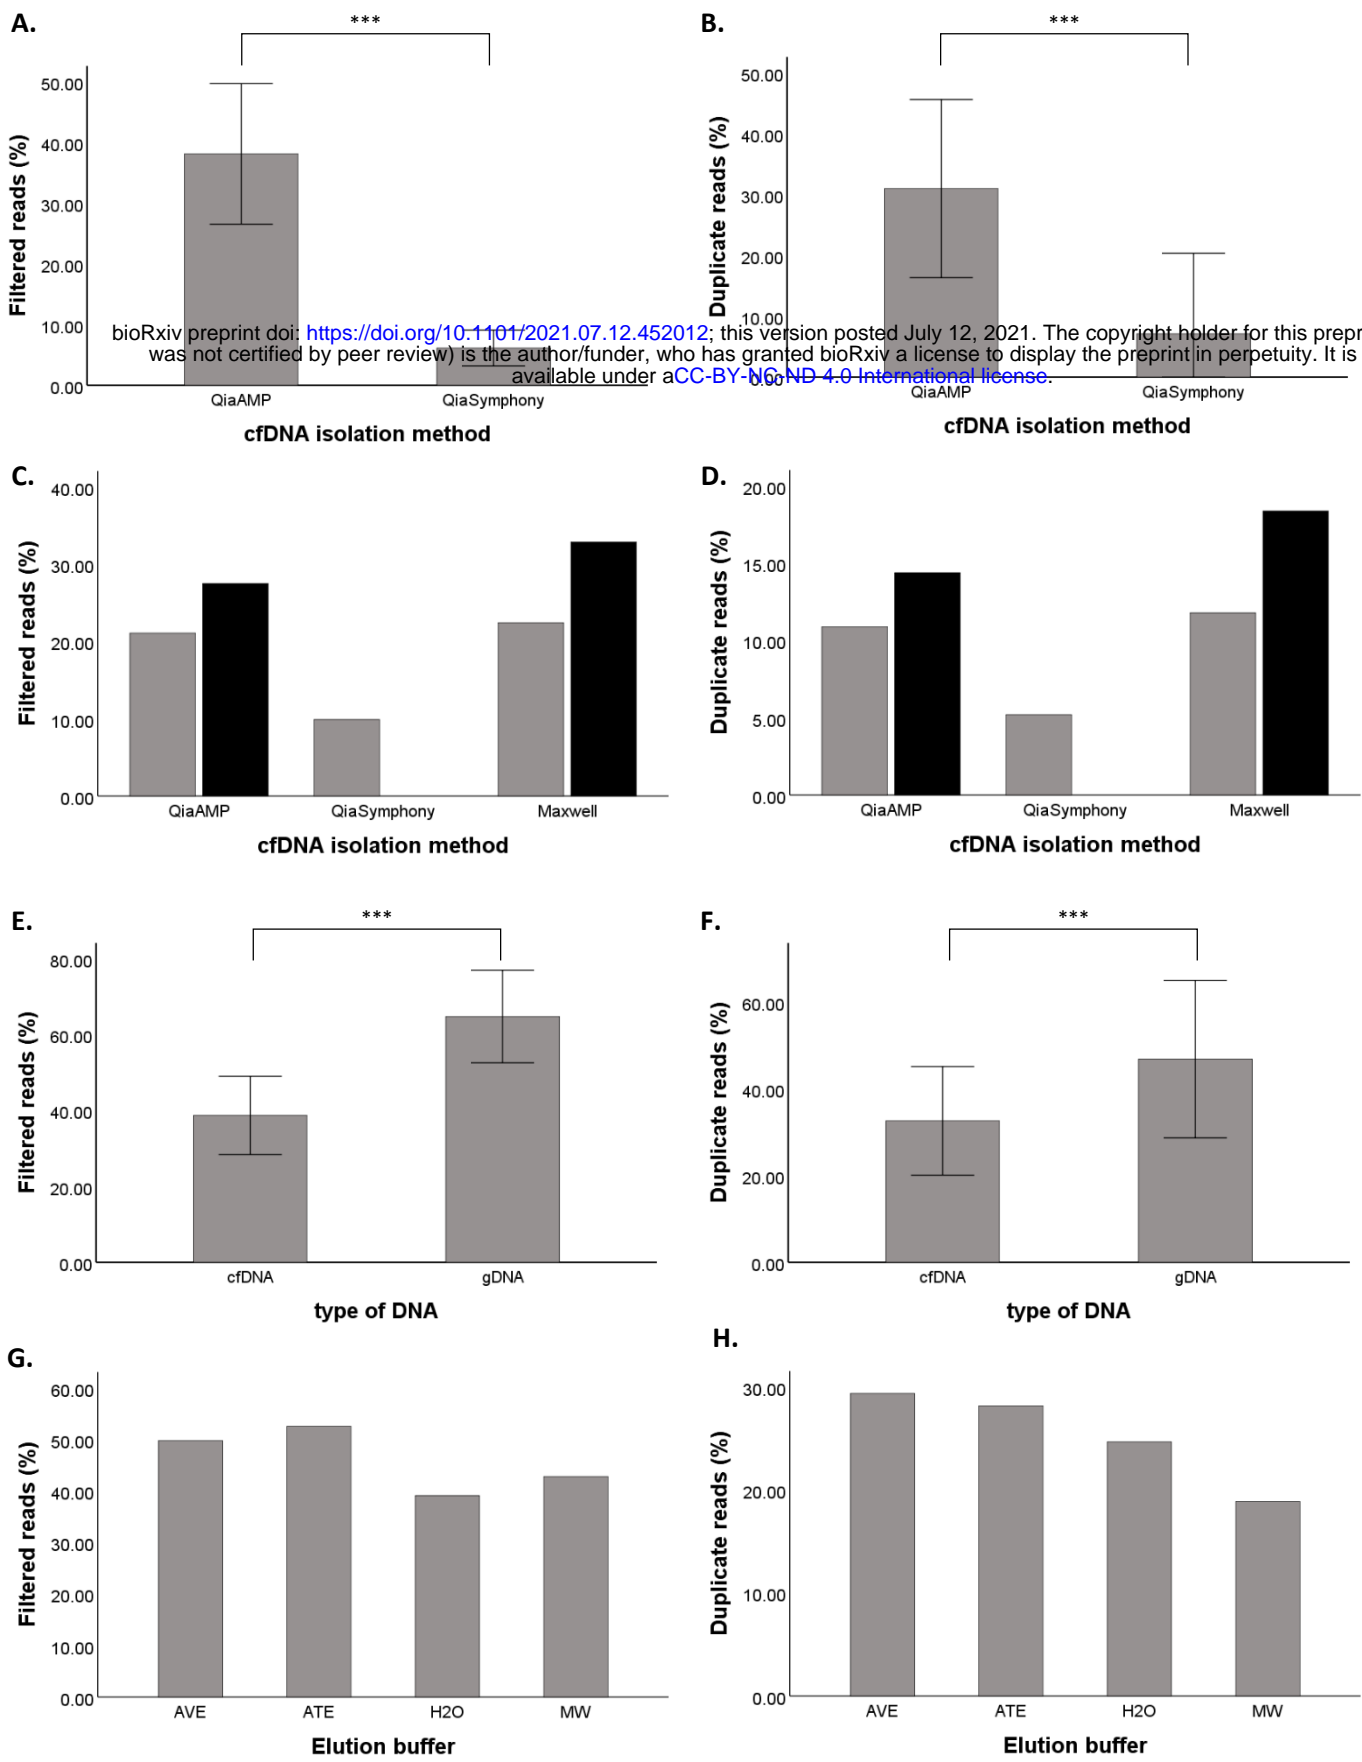

Figure 4

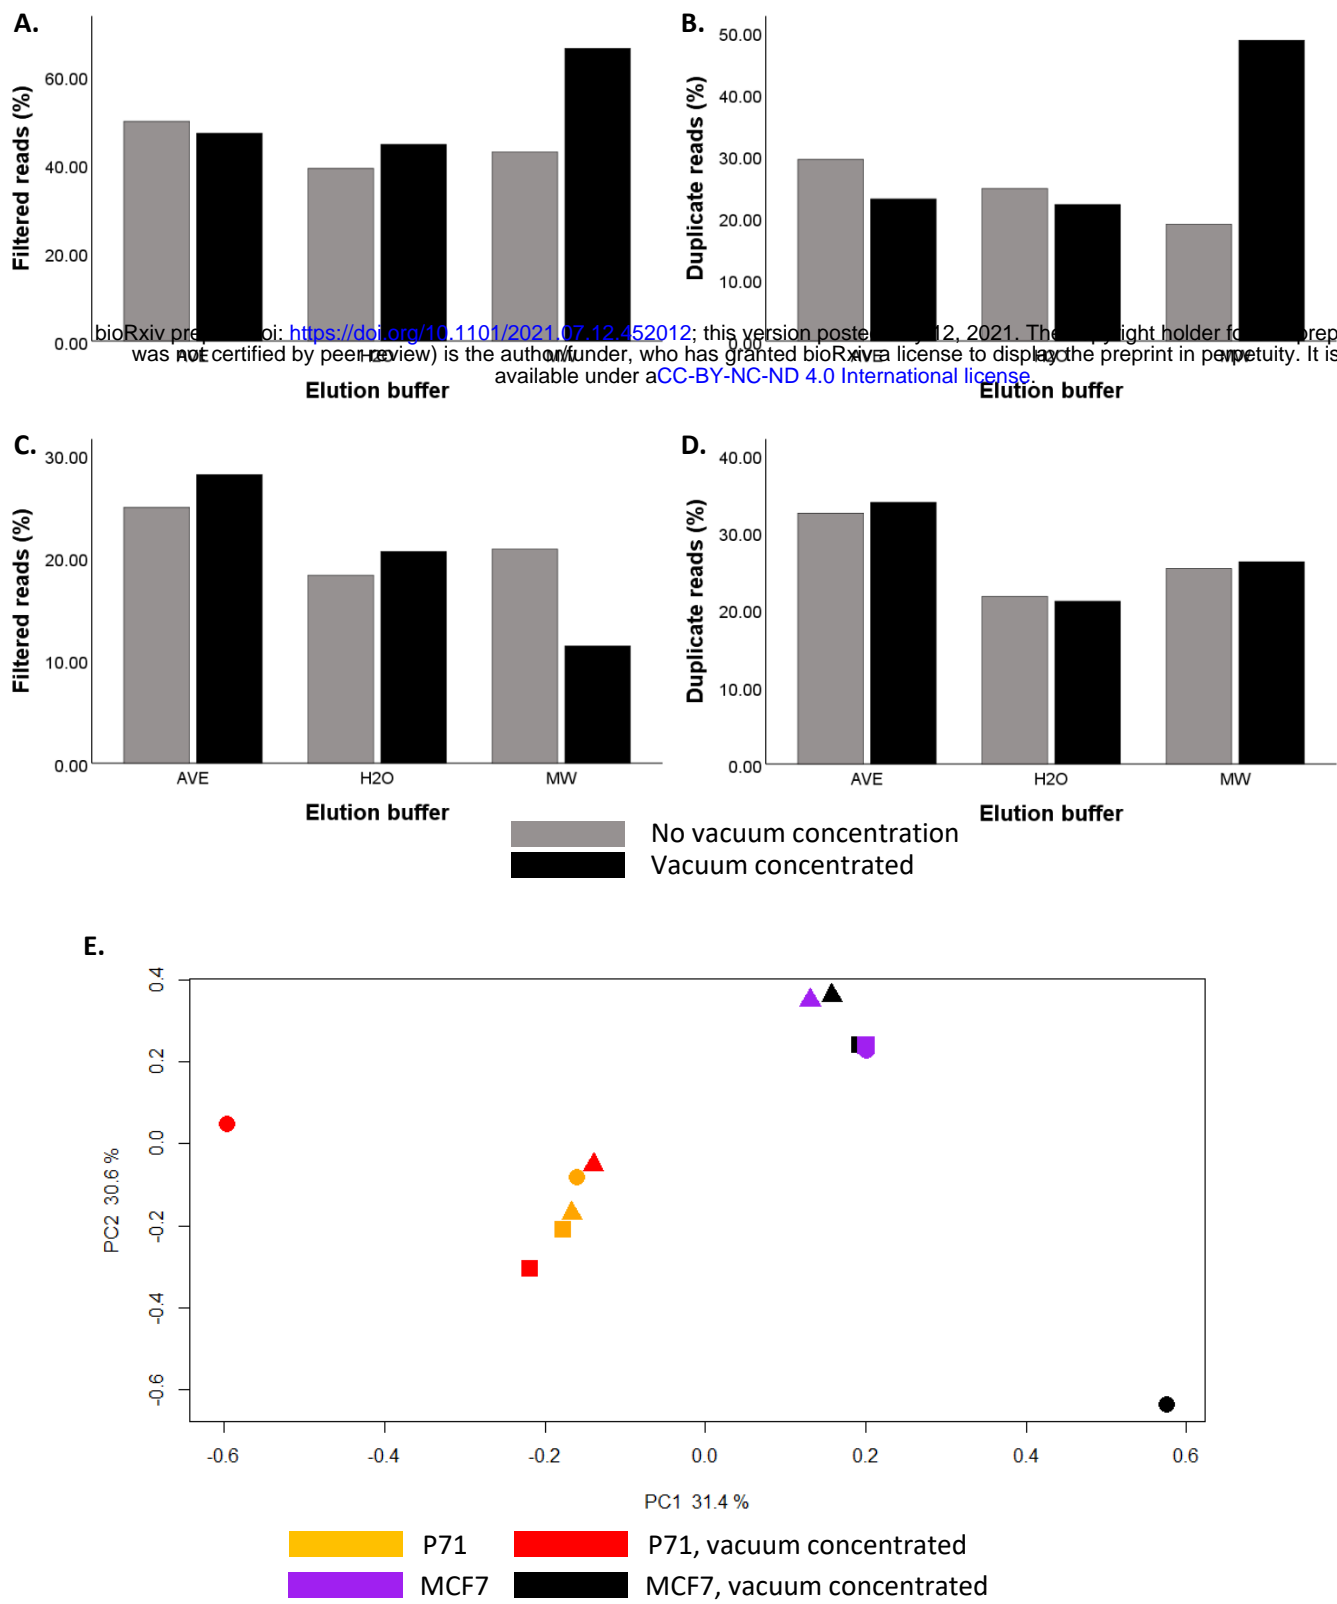



Figure 5

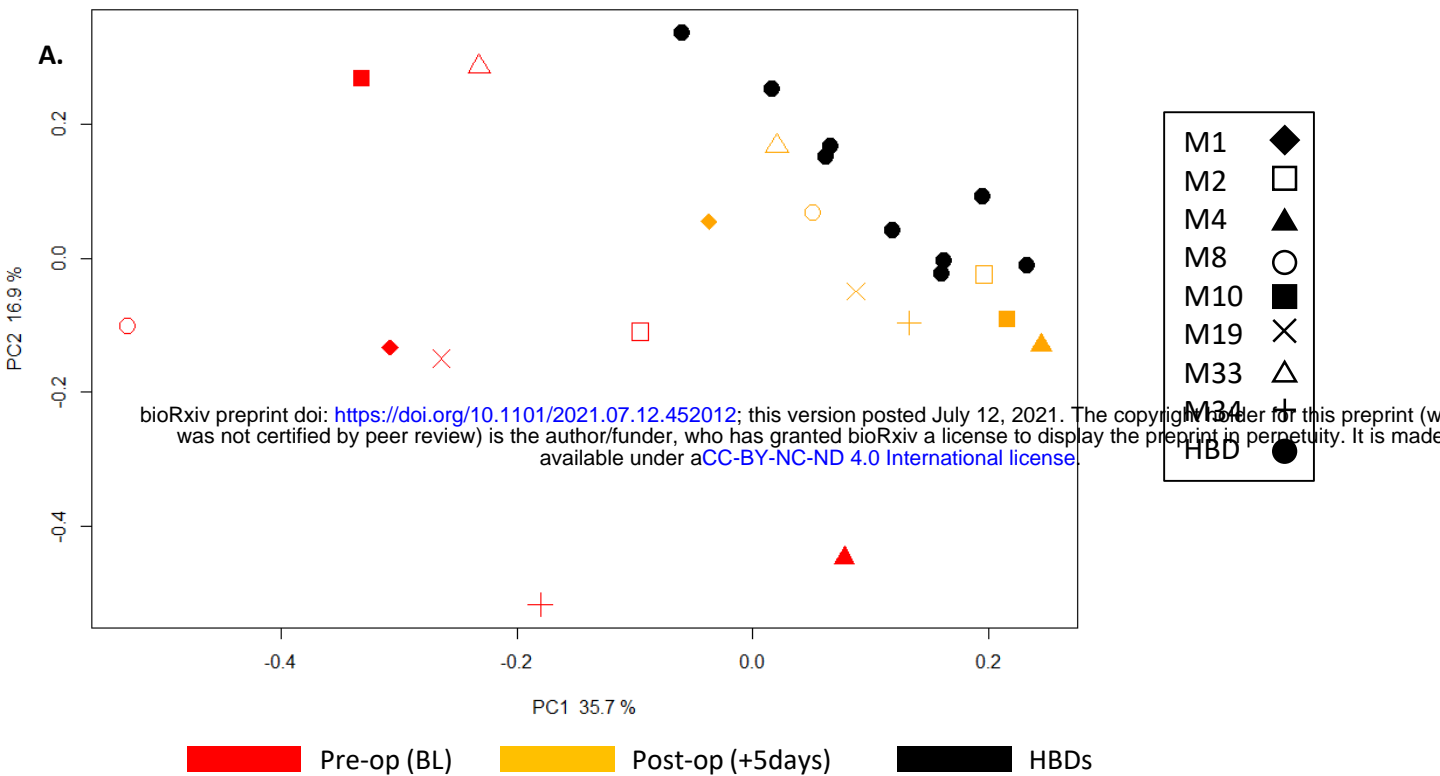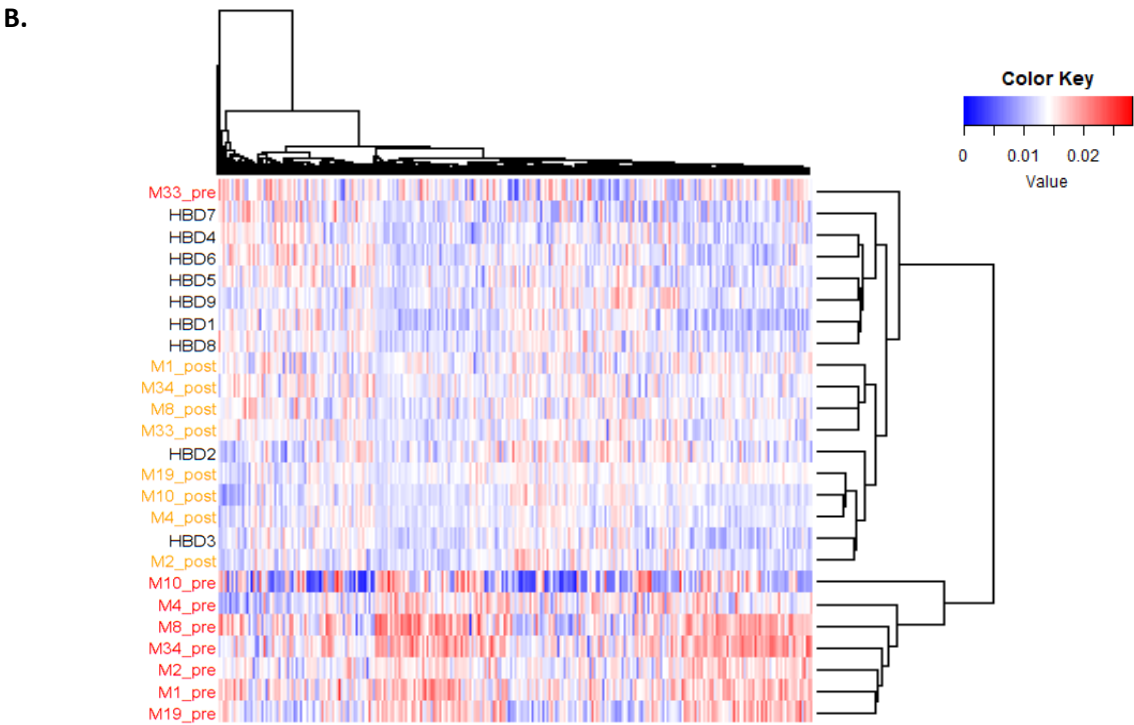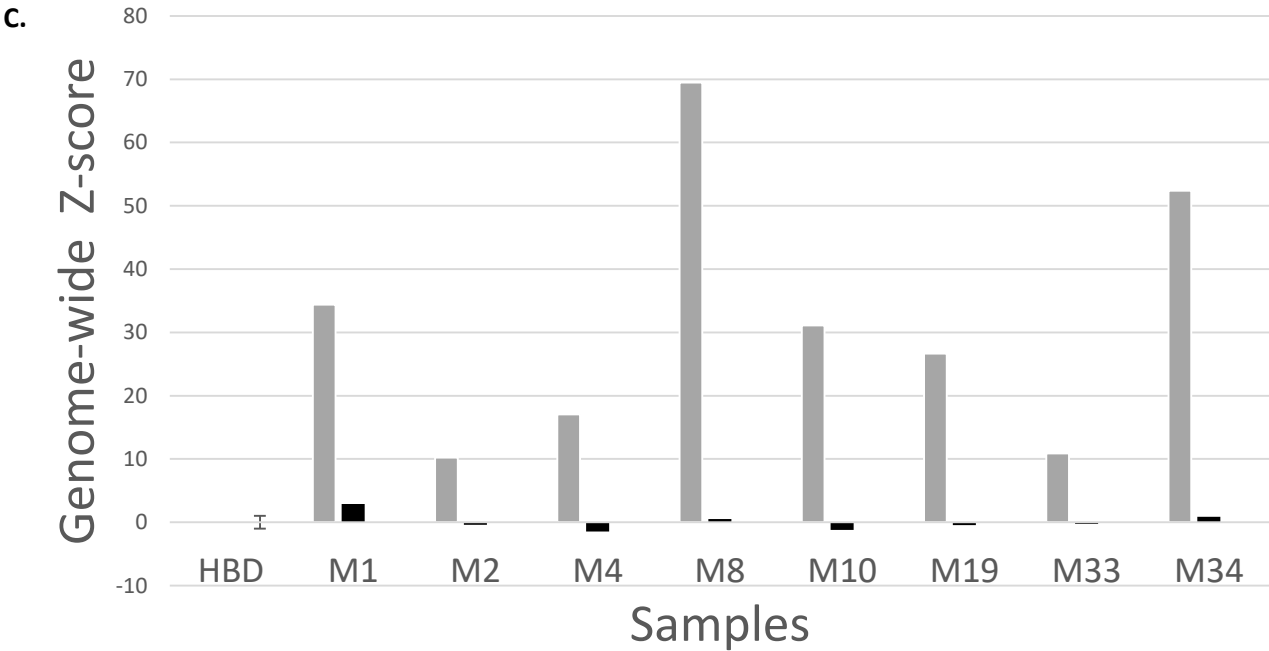

Figure 6

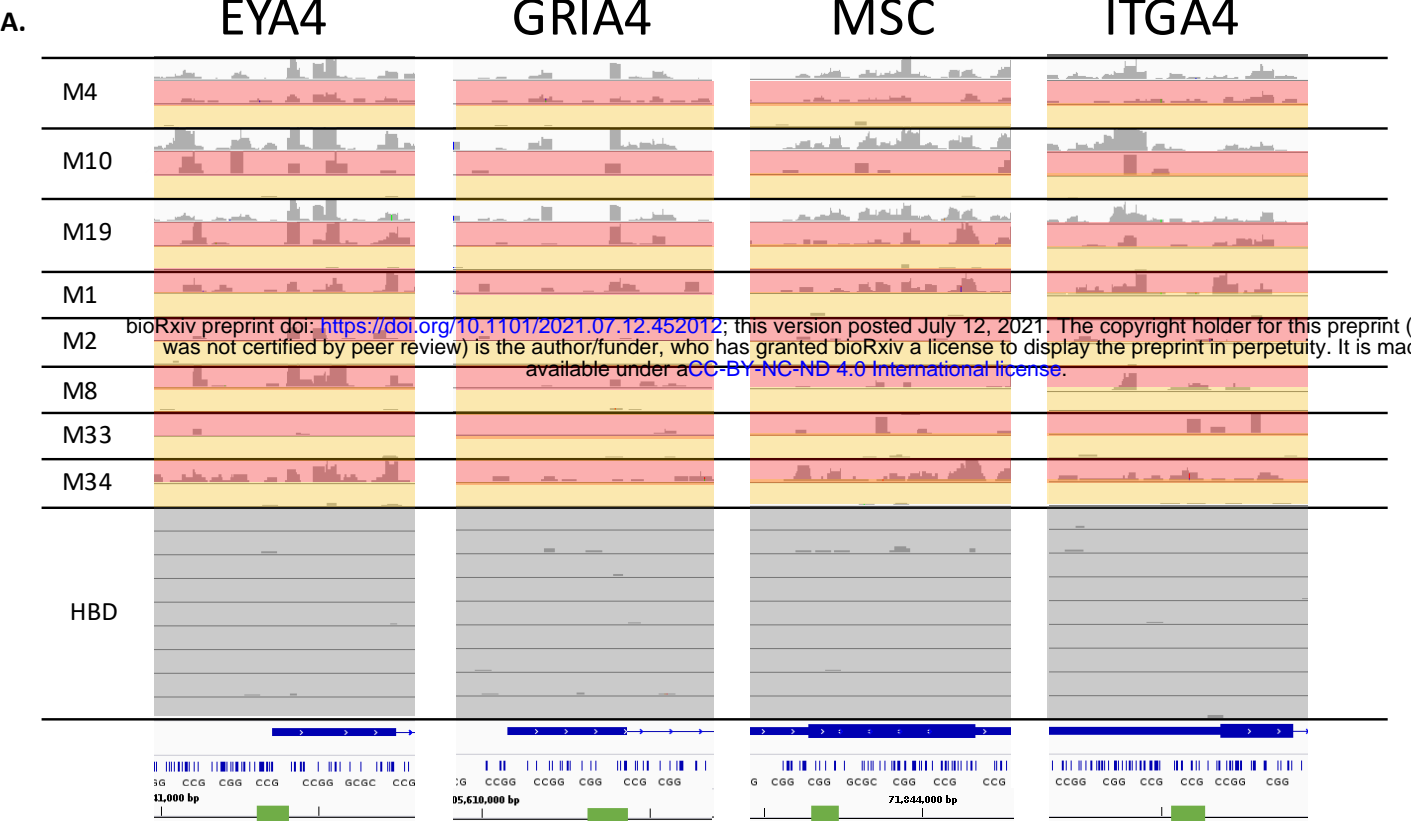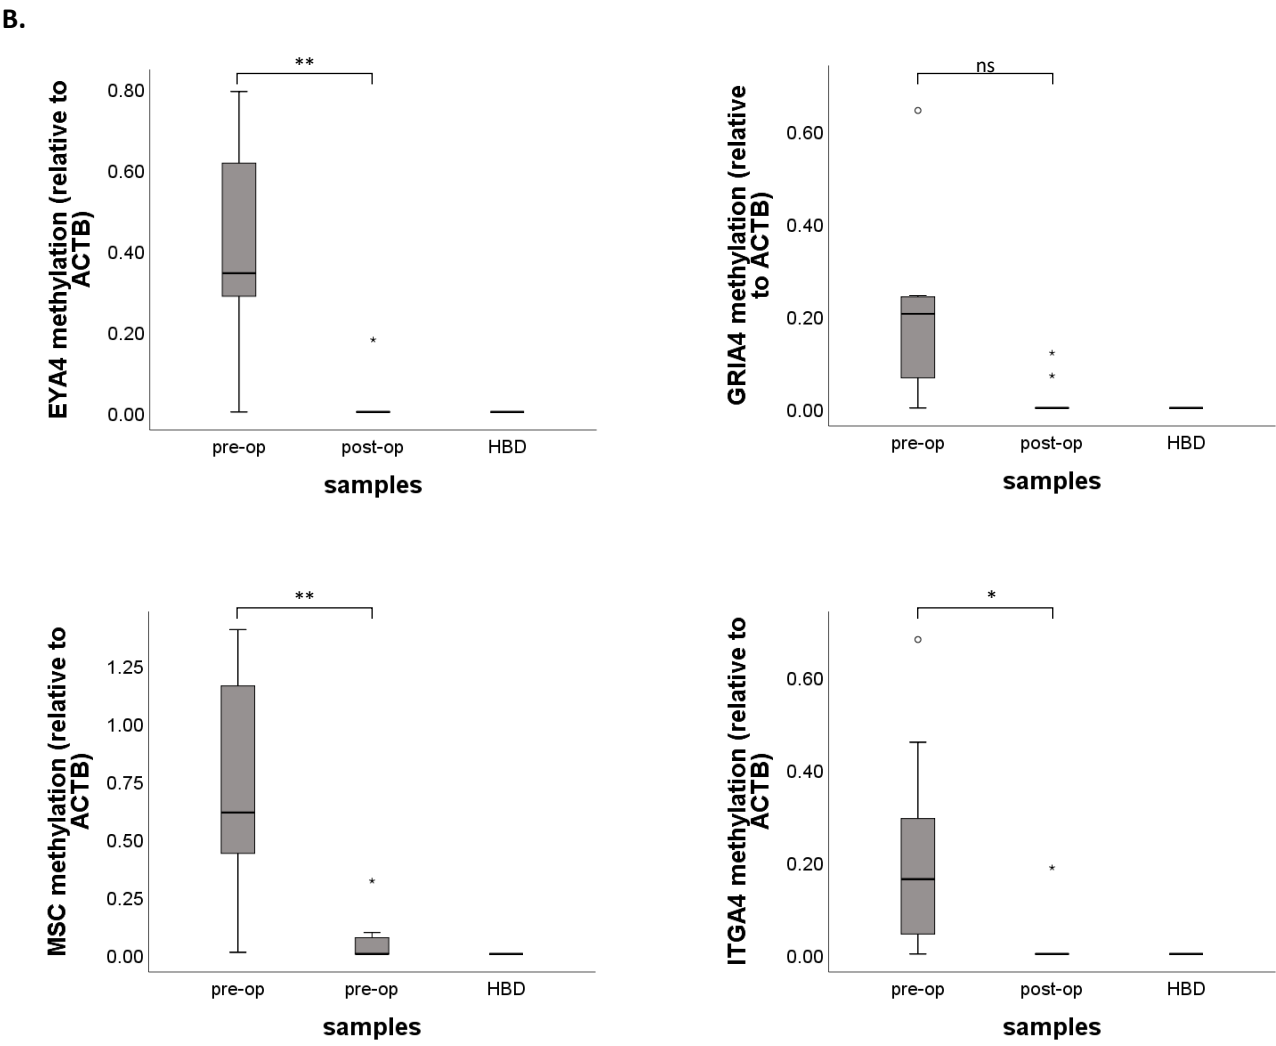

Supplementary Figure 1 – Results for EDTA and CellSave

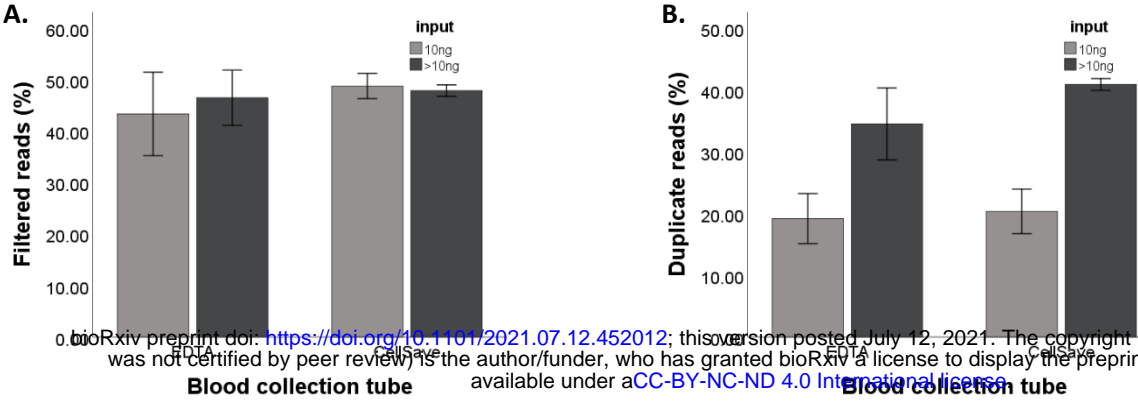

Supplementary Figure 2 – Observed correlations between biological replicates compared to HBDs

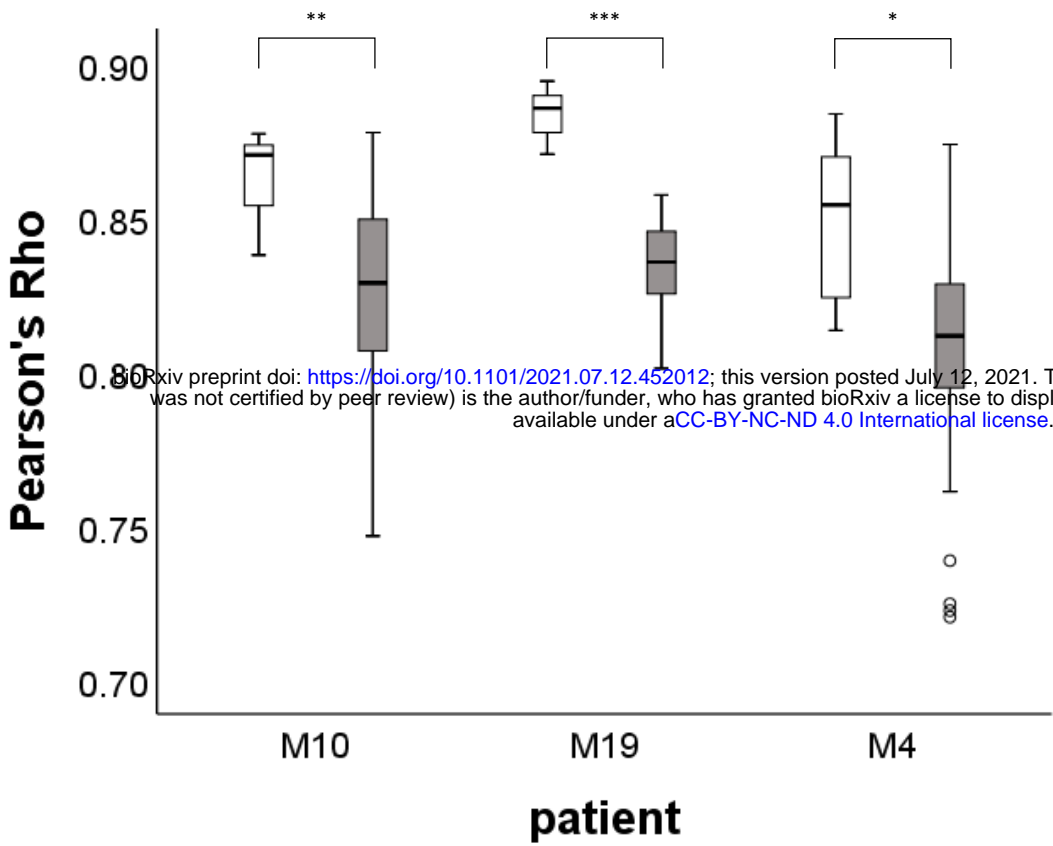

Supplementary Figure 3

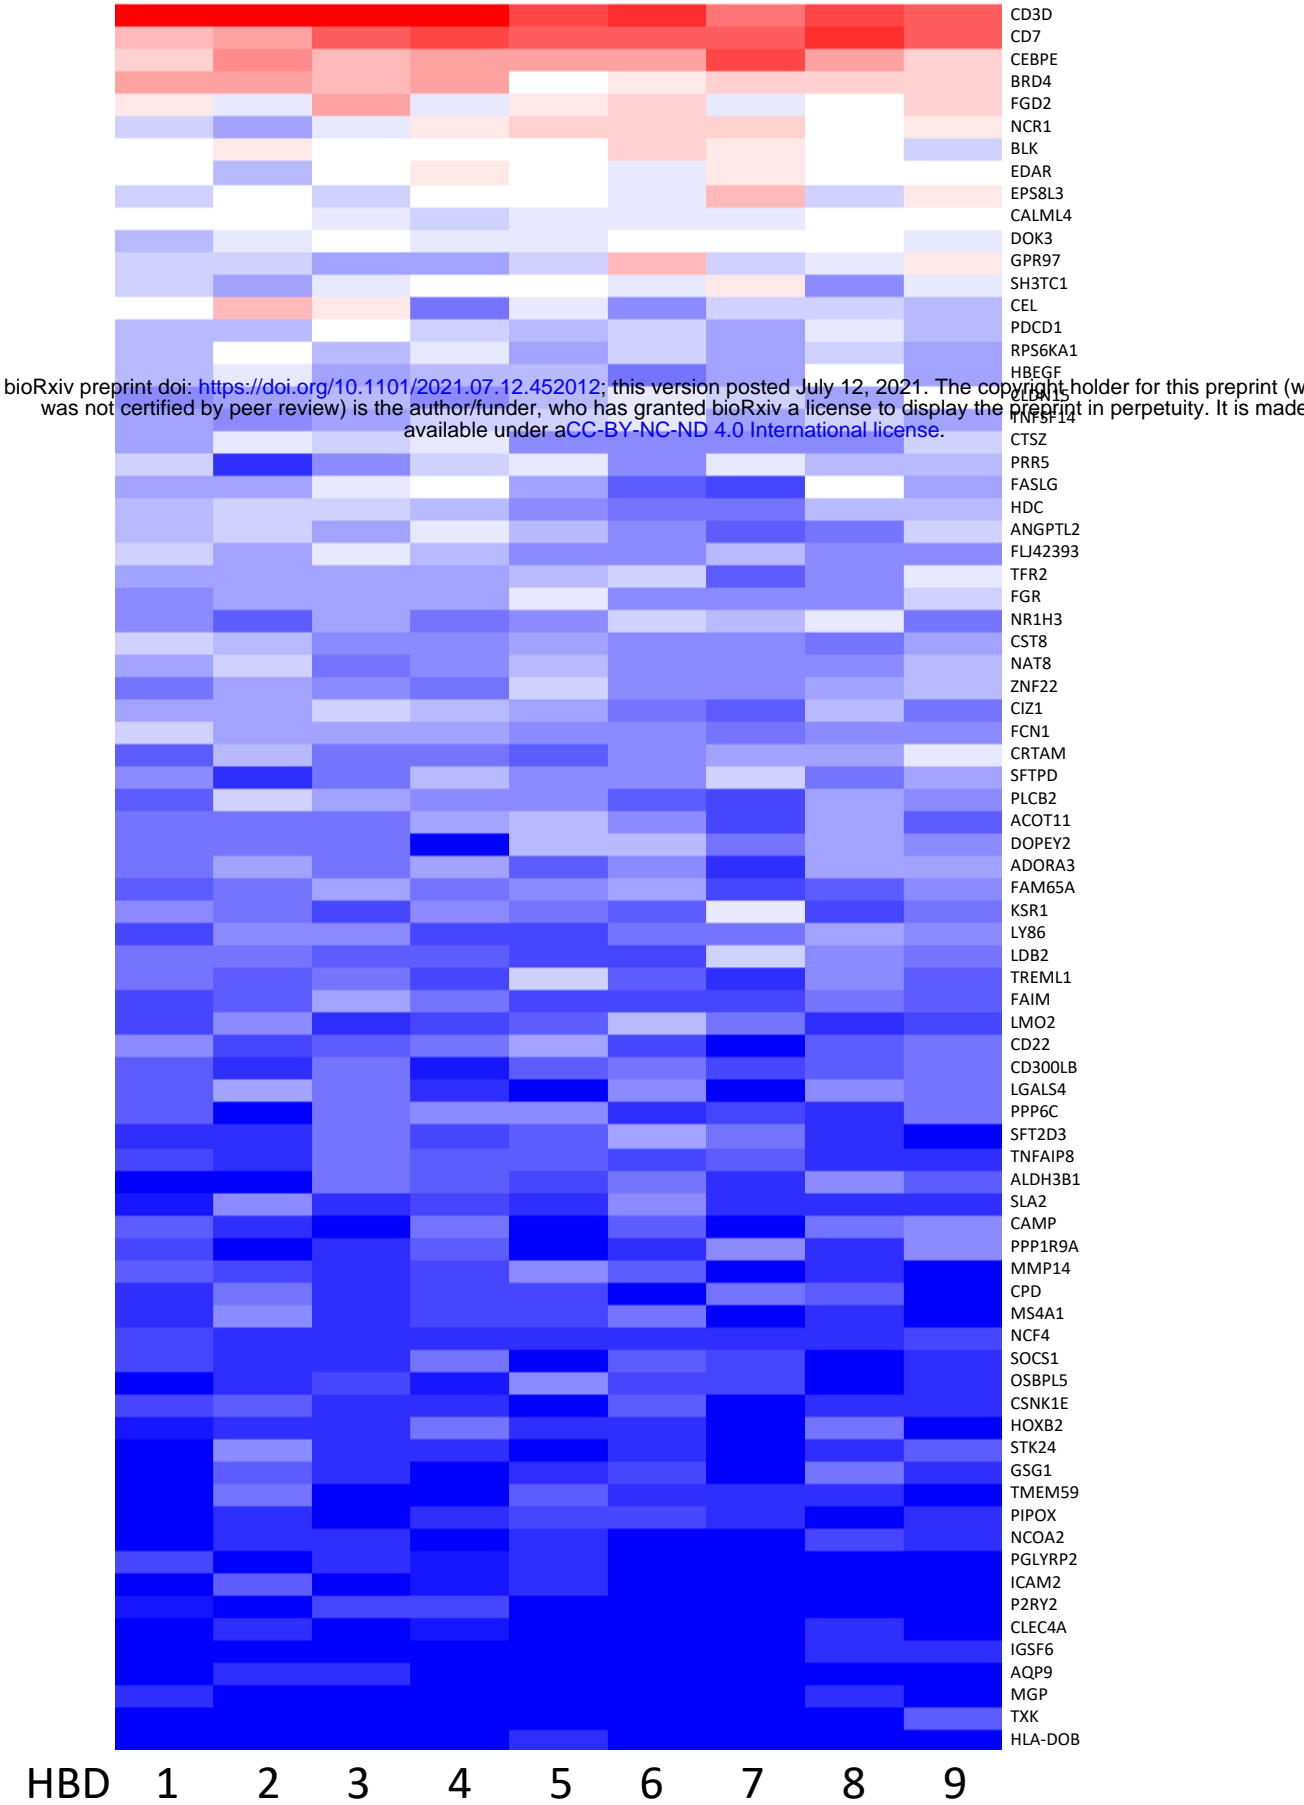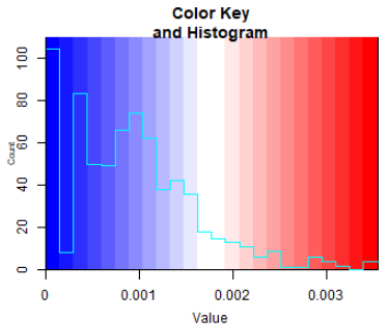

Supplementary Figure 4

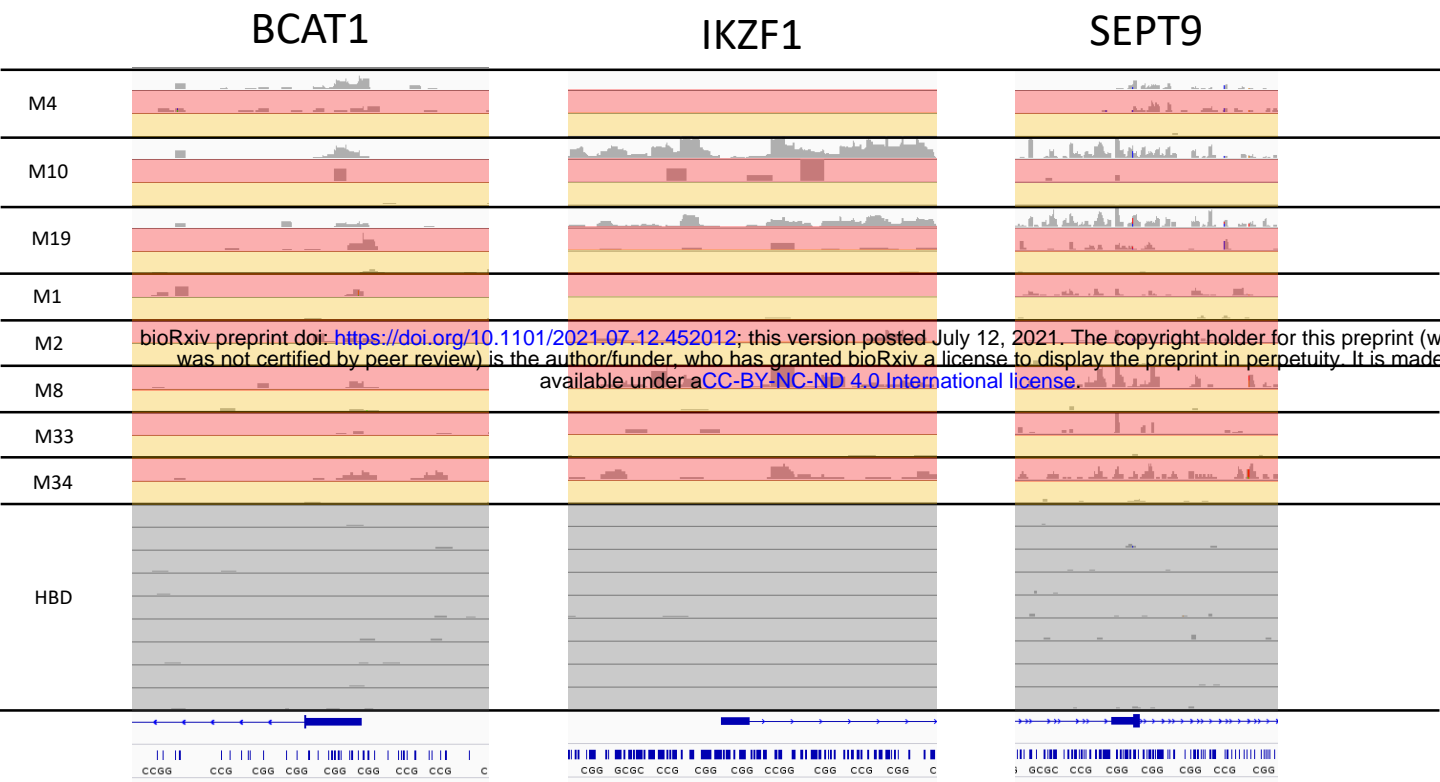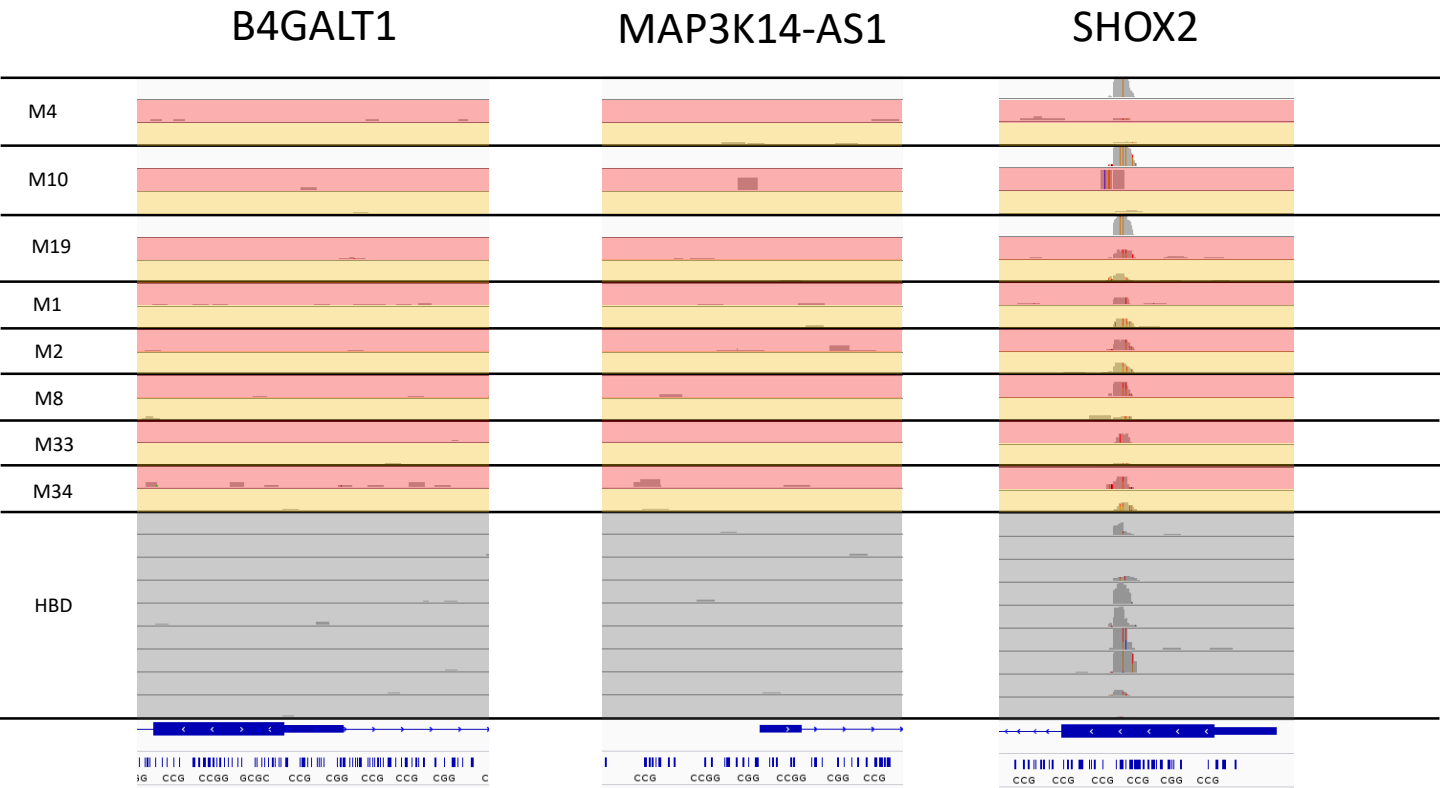

Supplementary Figure 5

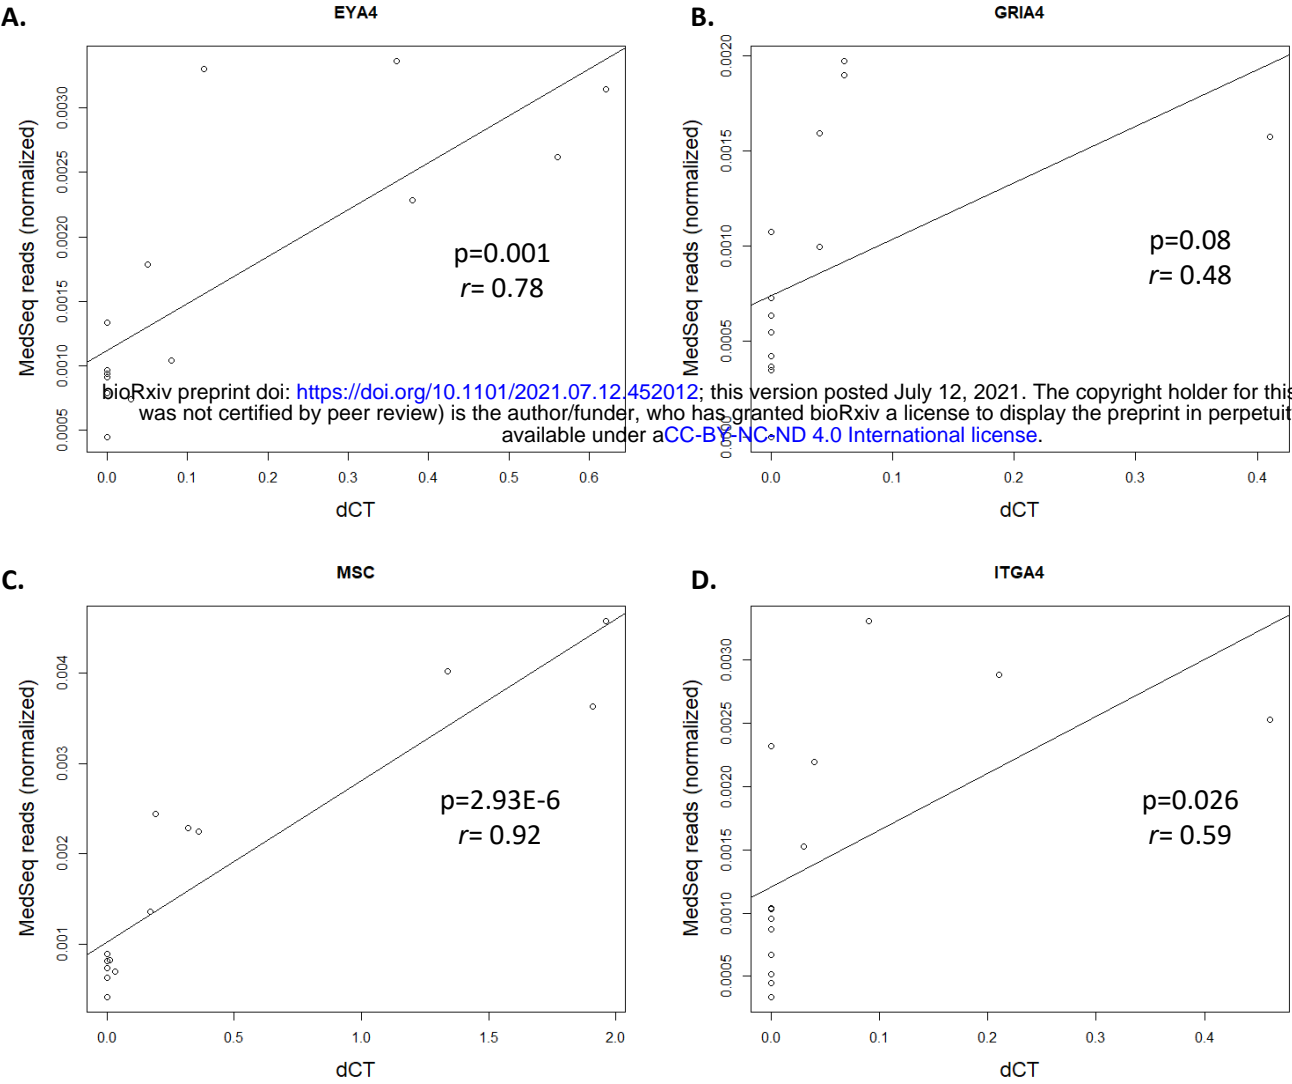

Source: https://biorxiv.org/content/10.1101/2021.07.12.452012v1.full.pdf
